# Supplementary material for: Asymmetric transformation by dynamic crystallization of achiral succinimides
Source: Royal Society of Chemistry journal article supplement (doi:10.1039/c3cc41678j), 2013-01-01

## Supporting Information

### Asymmetric Transformation by Dynamic Crystallization of Achiral Succinimides

Shoko Hachiya,<sup>†</sup> Yoshio Kasashima,<sup>‡</sup> Fumitoshi Yagishita,<sup>†,§</sup> Takashi Mino,<sup>†</sup> Hyuma Masu,<sup>§</sup>

Masami Sakamoto<sup>†\*</sup>

<sup>†</sup>Department of Applied Chemistry and Biotechnology, Graduate School Engineering, Chiba University, Yayoi-cho, Inage-ku, Chiba-shi, Chiba 263-8522 Japan

<sup>‡</sup>Education Center, Faculty of Engineering, Chiba Institute of Technology, Shibazono 2-2-1, Narashino-shi, Chiba 275-0023, Japan

<sup>§</sup>Chiba Analysis Center, Chiba University, Yayoi-cho, Inage-ku, Chiba-shi, Chiba 263-8522 Japan

## Table of Contents

|                                                                                                  |     |
|--------------------------------------------------------------------------------------------------|-----|
| General experimental: -----                                                                      | S3  |
| Preparation of 3,4-diphenylmaleimides <b>1a-1k</b> -----                                         | S3  |
| Preparation of <i>cis</i> -3,4-diphenylsuccinimides <b>2d</b> and <b>2e</b> -----                | S3  |
| Preparation of <i>trans</i> -3,4-diphenylsuccinimides <b>3a-k</b> -----                          | S4  |
| X-Ray single crystal data of <b>3a</b> , <b>3e</b> , <b>3g</b> , <b>3h</b> , and <b>3j</b> ----- | S5  |
| Kinetic studies for racemization of <b>2d</b> , <b>2e</b> , and <b>2i</b> -----                  | S8  |
| Method for crystallization involving stereoisomerization -----                                   | S9  |
| References -----                                                                                 | S10 |
| NMR Chart for <b>2d</b> , <b>2e</b> and <b>3a-k</b> -----                                        | S11 |
| HPLC analysis of <b>3d</b> , <b>3e</b> and <b>3i</b> -----                                       | S38 |

### General experimental:

General. NMR spectra were recorded on CDCl<sub>3</sub> solutions on a BRUKER 300 operating 300 MHz, respectively, for <sup>1</sup>H- and <sup>13</sup>C-NMR spectroscopy. Chemical shifts are reported in parts per million (ppm) relatives to TMS as internal standards. IR spectra were recorded on a JASCO FT/IR-230 spectrometer as KBr disks. Specific rotation was measured by a DIP 370 polarimeter (JASCO).

### Preparation of 3,4-diphenylmaleimides 1a-k

**3,4-Diphenylmaleimides 1a-k** were synthesized from 3,4-diphenylmaleic anhydride and the corresponding amines according to the literature<sup>[S1]</sup>.

### Preparation of *cis*-3,4-diphenylsuccinimides 2d and 2e

An ethyl acetate solution of 3,4-diphenylmaleimide was stirred under hydrogen atmosphere in the presence of catalytic amount of PtO<sub>2</sub> until the yellowish green color disappeared. PtO<sub>2</sub> was filtered off through celite column, and the filtrate was evaporated. Chromatography (eluent: a mixture of ethyl acetate and hexane) or by crystallization from with a minimum of CHCl<sub>3</sub> and an excess of hexane gave the desired *cis*-3,4-diphenylmaleimide product almost quantitative yield.

*cis*-**N-propyl-3,4-diphenylsuccinimide 2d** was obtained as colorless crystals: m.p. 81-83 °C; IR (KBr) 1775, 1697 cm<sup>-1</sup>; <sup>1</sup>H NMR (CDCl<sub>3</sub>) δ 1.03 (t, *J* = 7.4 Hz, 3H), 1.73-1.86 (m, 2H), 3.71 (t, *J* = 7.4 Hz, 2H), 4.46 (s, 2H), 6.78-7.00 (m, 4H), 7.02-7.08 (m, 6H); <sup>13</sup>C NMR (CDCl<sub>3</sub>) δ 11.4, 21.3, 40.8, 52.2, 127.1, 128.1, 129.1, 133.9, 177.1; HRMS (ESI-MS) *m/z* calcd for C<sub>19</sub>H<sub>19</sub>O<sub>2</sub>N + Na 316.1308, found 316.1302

*cis*-**N-isopropyl-3,4-diphenylsuccinimide 2e** was obtained as colorless crystals: 110-114 °C; IR (KBr) 1772, 1699 cm<sup>-1</sup>; <sup>1</sup>H NMR (CDCl<sub>3</sub>) δ 1.56 (d, *J* = 6.9 Hz, 6H), 4.41 (s, 2H), 4.64 (sep, *J* = 7.0 Hz, 1H), 6.78-6.81 (m, 4H), 7.02-7.25 (m, 6H); <sup>13</sup>C NMR (CDCl<sub>3</sub>) δ 19.4, 44.3, 52.1, 127.1, 128.1, 129.1, 134.1, 177.0; HRMS (ESI-MS) *m/z* calcd for C<sub>19</sub>H<sub>19</sub>O<sub>2</sub>N + Na 316.1308, found 316.1304

### Preparation of *trans*-3,4-diphenylsuccinimides 3a-k

*Trans*-3,4-diphenylsuccinimides **3** were synthesized from the corresponding *cis* isomers **2**. Crude *cis* isomers **2** generated by hydrogenation of the corresponding 3,4-diphenylmaleimides **1** with hydrogen in the presence of PtO<sub>2</sub> were directly isomerized to *trans* isomers **3** by catalytic amount of DBU. Catalytic amount of DBU (0.10 eq.) was added to a chloroform solution of *cis* isomer and the mixture was stirred for overnight at room temperature. The reaction mixture

was concentrated *in vacuo*, and the residue was chromatographed on silica gel (eluent: a mixture of ethyl acetate and hexane). Crystalline *trans* isomers **3** were purified by crystallization with a minimum of  $\text{CHCl}_3$  and an excess of hexane. In all cases, *trans* isomers **3** were obtained in almost quantitative yields through hydrogenation and isomerization.

The structure of **3a**, **3e**, **3g**, **3h**, and **3j** was unequivocally established by X-ray single crystallographic analysis. Other *trans* isomers did not give available crystals for single crystal X-ray analysis.

**trans-3,4-diphenylsuccinimide 3a** was obtained as colorless crystals: m.p. 197-199 °C; IR (KBr) 3318, 1795, 1701  $\text{cm}^{-1}$ ;  $^1\text{H}$  NMR ( $\text{CDCl}_3$ )  $\delta$  4.14 (s, 2H), 7.20-7.23 (m, 4H), 7.31-7.42(m, 6H), 8.62(s, 1H);  $^{13}\text{C}$  NMR ( $\text{CDCl}_3$ )  $\delta$  56.6, 127.7, 128.2, 129.3, 135.8, 176.5; HRMS (ESI-MS)  $m/z$  calcd for  $\text{C}_{16}\text{H}_{13}\text{O}_2\text{N} + \text{Na}$  274.0838, found 274.0840.

**trans-N-methyl-3,4-diphenylsuccinimide 3b** was obtained as colorless crystals: m.p. 107-108 °C; IR (KBr) 1774, 1689  $\text{cm}^{-1}$ ;  $^1\text{H}$  NMR ( $\text{CDCl}_3$ )  $\delta$  3.13 (s, 3H), 4.05 (s, 2H), 7.15-7.17 (m, 4H), 7.26-7.36 (m, 6H);  $^{13}\text{C}$  NMR ( $\text{CDCl}_3$ )  $\delta$  25.4, 55.3, 127.6, 127.9, 129.0, 136.2, 176.5; HRMS (ESI-MS)  $m/z$  calcd for  $\text{C}_{17}\text{H}_{15}\text{O}_2\text{N} + \text{Na}$  288.0995, found 288.0993

**trans-N-ethyl-3,4-diphenylsuccinimide 3c** was obtained as colorless crystals: m.p. 86-87 °C; IR (KBr) 1776, 1693  $\text{cm}^{-1}$ ;  $^1\text{H}$  NMR ( $\text{CDCl}_3$ )  $\delta$  1.29 (t,  $J = 7.2$  Hz, 3H), 3.74 (q,  $J = 7.2$  Hz, 2H), 4.03 (s, 2H), 7.16-7.19 (m, 4H), 7.30-7.41 (m, 6H);  $^{13}\text{C}$  NMR ( $\text{CDCl}_3$ )  $\delta$  13.2, 34.4, 55.5, 127.6, 128.0, 129.3, 136.7, 176.5; HRMS (ESI-MS)  $m/z$  calcd for  $\text{C}_{18}\text{H}_{17}\text{O}_2\text{N} + \text{Na}$  302.1152, found 302.1149

**trans-N-propyl-3,4-diphenylsuccinimide 3d** was obtained as colorless crystals: m.p. 67-69 °C; IR (KBr) 1774, 1697  $\text{cm}^{-1}$ ;  $^1\text{H}$  NMR ( $\text{CDCl}_3$ )  $\delta$  0.98 (t,  $J = 7.4$  Hz, 3H), 1.67-1.79 (m, 2H), 3.65 (t,  $J = 7.3$  Hz, 2H), 4.04 (s, 2H) 7.16-7.19 (m, 4H), 7.32-7.41 (m, 6H);  $^{13}\text{C}$  NMR ( $\text{CDCl}_3$ )  $\delta$  11.3, 21.1, 40.9, 55.4, 127.6, 128.0, 129.2, 136.6, 176.7; HRMS (ESI-MS)  $m/z$  calcd for  $\text{C}_{19}\text{H}_{19}\text{O}_2\text{N} + \text{Na}$  316.1308, found 316.1306

**trans-N-isopropyl-3,4-diphenylsuccinimide 3e** was obtained as colorless crystals: m.p. 152-153 °C; IR (KBr) 1773, 1696  $\text{cm}^{-1}$ ;  $^1\text{H}$  NMR ( $\text{CDCl}_3$ )  $\delta$  1.48 (d,  $J = 6.9$  Hz, 3H), 1.50 (d,  $J = 6.9$  Hz, 3H), 3.97 (s, 2H), 4.54 (sep,  $J = 6.9$  Hz, 1H), 7.15-7.18 (m, 4H), 7.28-7.39 (m, 6H);  $^{13}\text{C}$  NMR ( $\text{CDCl}_3$ )  $\delta$  19.2, 19.4, 44.4, 55.2, 127.5, 127.9, 129.2, 136.9, 176.6; HRMS (ESI-MS)  $m/z$  calcd for  $\text{C}_{19}\text{H}_{19}\text{O}_2\text{N} + \text{Na}$  316.1308, found 316.1304

**trans-N-benzyl-3,4-diphenylsuccinimide 3f** was obtained as colorless crystals: m.p. 86-88 °C; IR (KBr) 1783, 1708  $\text{cm}^{-1}$ ;  $^1\text{H}$  NMR ( $\text{CDCl}_3$ )  $\delta$  4.05 (s, 2H), 4.77 and 4.86 (ABq,  $J = 14.0$  Hz, 2H), 7.10-7.13 (m, 4H), 7.24-7.38 (m, 9H), 7.43-7.46 (m, 2H);  $^{13}\text{C}$  NMR ( $\text{CDCl}_3$ )  $\delta$  43.0, 55.4, 127.6, 128.0, 128.1, 128.7, 129.2, 135.7, 136.4, 176.3; HRMS (ESI-MS)  $m/z$  calcd for  $\text{C}_{23}\text{H}_{19}\text{O}_2\text{N} + \text{Na}$  364.1308, found 364.1303

**trans-N-phenethyl-3,4-diphenylsuccinimide 3g** was obtained as colorless crystals: m.p. 121-123 °C; IR (KBr) 1773, 1707  $\text{cm}^{-1}$ ;  $^1\text{H}$  NMR ( $\text{CDCl}_3$ )  $\delta$  2.99-3.15 (m, 2H), 3.88-4.08 (m, 4H), 6.97-7.00(m, 4H), 7.25-7.36 (m, 11H) ;  $^{13}\text{C}$  NMR ( $\text{CDCl}_3$ )  $\delta$  33.1, 40.1, 55.5, 126.8, 127.6, 127.9, 128.6, 129.09, 129.15, 136.5, 127.4, 176.5; HRMS (ESI-MS)  $m/z$  calcd for  $\text{C}_{24}\text{H}_{21}\text{O}_2\text{N} + \text{Na}$  378.1465, found 378.1460

**trans-N-phenyl-3,4-diphenylsuccinimide 3h** was obtained as colorless crystals: m.p. 236-238 °C; IR (KBr) 1775, 1709  $\text{cm}^{-1}$ ;  $^1\text{H}$  NMR ( $\text{CDCl}_3$ )  $\delta$  4.24 (s, 2H), 7.25-7.53 (m, 15H);  $^{13}\text{C}$  NMR ( $\text{CDCl}_3$ )  $\delta$  55.4, 126.5, 127.7, 128.2, 128.8, 129.2, 129.3, 131.9, 136.5, 175.7; HRMS (ESI-MS)  $m/z$  calcd for  $\text{C}_{22}\text{H}_{17}\text{O}_2\text{N} + \text{H}$  328.1332, found 328.1332

**trans-N-(2-methylphenyl)-3,4-diphenylsuccinimide 3i** was obtained as colorless crystals: m.p. 176-177 °C; IR (KBr) 1779, 1710  $\text{cm}^{-1}$ ;  $^1\text{H}$  NMR ( $\text{CDCl}_3$ )  $\delta$  2.25 (s, 3H), 4.24 (d,  $J = 5.4$  Hz, 2H), 4.28 (d,  $J = 5.4$  Hz, 2H), 7.17-7.19 (m, 1H), 7.25-7.44 (m, 13H);  $^{13}\text{C}$  NMR ( $\text{CDCl}_3$ )  $\delta$  18.0, 55.7, 55.9, 127.1, 127.6, 127.7, 128.0, 128.2, 129.4, 129.7, 131.1, 131.3, 135.6, 136.6, 175.5, 175.7; HRMS (ESI-MS)  $m/z$  calcd for  $\text{C}_{23}\text{H}_{19}\text{O}_2\text{N} + \text{Na}$  364.1308, found 364.1304

**trans-N-(3-methylphenyl)-3,4-diphenylsuccinimide 3j** was obtained as colorless crystals: m.p. 175-178 °C; IR (KBr) 1777, 1706  $\text{cm}^{-1}$ ;  $^1\text{H}$  NMR ( $\text{CDCl}_3$ )  $\delta$  2.41 (s, 3H), 4.22 (s, 2H), 7.17-7.44 (m, 14H);  $^{13}\text{C}$  NMR ( $\text{CDCl}_3$ )  $\delta$  21.3, 55.4, 123.6, 127.1, 127.6, 128.1, 129.0, 129.3, 129.7, 131.7, 126.6, 139.3, 175.8; HRMS (ESI-MS)  $m/z$  calcd for  $\text{C}_{23}\text{H}_{19}\text{O}_2\text{N} + \text{H}$  342.1489, found 342.1487

**trans-N-(4-methylphenyl)-3,4-diphenylsuccinimide 3k** was obtained as colorless crystals: m.p. 170-171 °C; IR (KBr) 1776, 1711  $\text{cm}^{-1}$ ;  $^1\text{H}$  NMR ( $\text{CDCl}_3$ )  $\delta$  2.39 (s, 3H), 4.22 (s, 2H), 7.25-7.43 (m, 14H);  $^{13}\text{C}$  NMR ( $\text{CDCl}_3$ )  $\delta$  21.2, 55.4, 126.2, 127.6, 128.1, 129.2, 129.3, 129.8, 136.6, 138.9, 175.8; HRMS (ESI-MS)  $m/z$  calcd for  $\text{C}_{23}\text{H}_{19}\text{O}_2\text{N} + \text{H}$  342.1489, found 342.1487

#### X-Ray single crystal analysis of *trans*-3,4-diphenylsuccinimide 3a

Crystal data of **3a** (recrystallized from a mixture of  $\text{CHCl}_3$  and hexane);  $\text{C}_{16}\text{H}_{13}\text{NO}_2$ ,  $M_r = 251.27$ , Orthorhombic space group *Pbcn*,  $a = 13.1134(11)$  Å,  $b = 13.6354(11)$  Å,  $c = 7.2439(6)$  Å,  $V = 1295.26(19)$  Å<sup>3</sup>,  $Z = 4$ ,  $\rho = 1.289$  g  $\text{cm}^{-3}$ , in the final least-square refinement cycles on  $F^2$ , the model converged to  $R_1 = 0.0376$ ,  $wR_2 = 0.0911$ , and GOF = 1.035 for 1154 reflections. CCDC 927187.

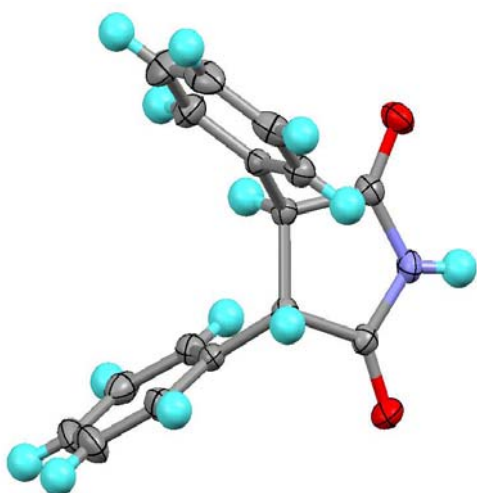

**Figure S1.** Ortep view of **3a** showing the atoms and thermal ellipsoids at 50% probability.

### X-Ray single crystal analysis of *trans*-*N*-isopropyl-3,4-diphenylsuccinimide **3e**

Crystal data of **3e** (recrystallized from a mixture of CHCl<sub>3</sub> and hexane); C<sub>19</sub>H<sub>19</sub>NO<sub>2</sub>, *Mr* = 293.35, Orthorhombic space group *P*2<sub>1</sub>2<sub>1</sub>2, *a* = 17.0588(3) Å, *b* = 5.30480(10) Å, *c* = 8.58540(10) Å, *V* = 776.92(2) Å<sup>3</sup>, *Z* = 2,  $\rho$  = 1.254 g cm<sup>-3</sup>, in the final least-square refinement cycles on *F*<sup>2</sup>, the model converged to *R*<sub>1</sub> = 0.0291, *wR*<sub>2</sub> = 0.0751, and GOF = 1.115 for 1267 reflections. CCDC 927188.

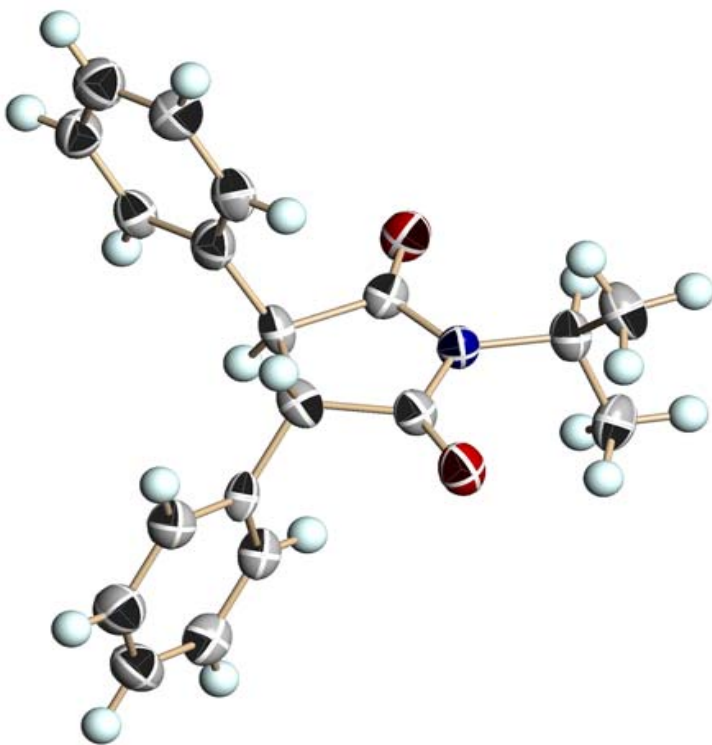

**Figure S2.** Ortep view of **3e** showing the atoms and thermal ellipsoids at 50% probability.

### X-Ray single crystal analysis of *trans*-*N*-phenethyl-3,4-diphenylsuccinimide **3g**

Crystal data of **3g** (recrystallized from a mixture of CHCl<sub>3</sub> and hexane); C<sub>24</sub>H<sub>21</sub>NO<sub>2</sub>, *Mr* = 355.42, Orthorhombic space group *P*bca, *a* = 11.729(4) Å, *b* = 8.588(3) Å, *c* = 37.580(13) Å, *V* = 3785(2) Å<sup>3</sup>, *Z* = 8,  $\rho$  = 1.247 g cm<sup>-3</sup>, in the final least-square refinement cycles on *F*<sup>2</sup>, the model converged to *R*<sub>1</sub> = 0.1009, *wR*<sub>2</sub> = 0.2307, and GOF = 1.107 for 3613 reflections. CCDC 927189.

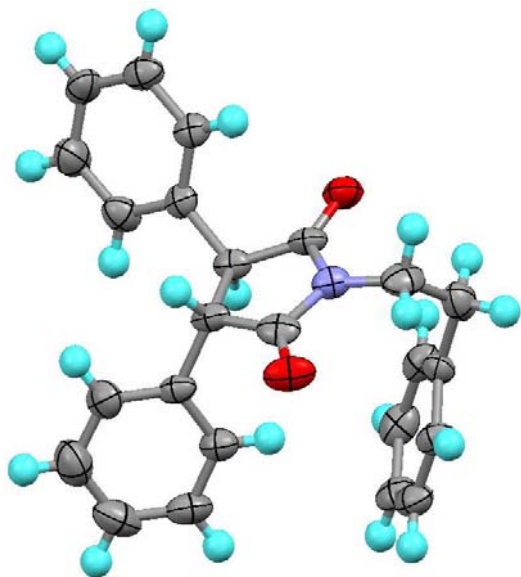

**Figure S3.** Ortep view of **3g** showing the atoms and thermal ellipsoids at 50% probability.

#### X-Ray single crystal analysis of *trans*-*N*-phenyl-3,4-diphenylsuccinimide **3h**

Crystal data of **3h** (recrystallized from a mixture of  $\text{CHCl}_3$  and hexane);  $\text{C}_{22}\text{H}_{17}\text{NO}_2$ ,  $M_r = 327.37$ , Orthorhombic space group  $Pbcn$ ,  $a = 17.1516(3) \text{ \AA}$ ,  $b = 11.5890(2) \text{ \AA}$ ,  $c = 8.4053(2) \text{ \AA}$ ,  $V = 1670.72(6) \text{ \AA}^3$ ,  $Z = 4$ ,  $\rho = 1.301 \text{ g cm}^{-3}$ , in the final least-square refinement cycles on  $F^2$ , the model converged to  $R_1 = 0.0357$ ,  $wR_2 = 0.1003$ , and  $\text{GOF} = 1.023$  for 1498 reflections. CCDC 927190.

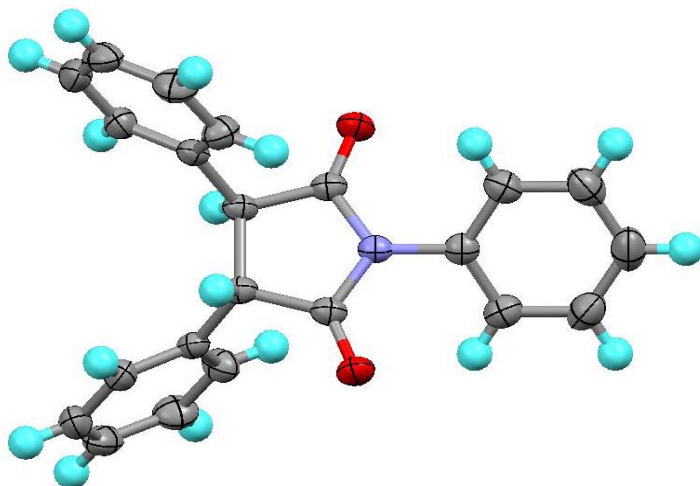

**Figure. S4.** Ortep view of **3h** showing the atoms and thermal ellipsoids at 50% probability.

### X-Ray single crystal analysis of *trans*-*N*-(3-methylphenyl)-3,4-diphenylsuccinimide **3j**

Crystal data of **3j** (recrystallized from a mixture of CHCl<sub>3</sub> and hexane); C<sub>23</sub>H<sub>19</sub>NO<sub>2</sub>, *M*<sub>r</sub> = 341.39, Monoclinic, space group *P*2<sub>1</sub>/*c*, *a* = 8.8218(6) Å, *b* = 17.4333(12) Å, *c* = 11.8783(9) Å, β = 100.3140(10)°, *V* = 1797.3(2) Å<sup>3</sup>, *Z* = 4, ρ = 1.262 g cm<sup>-3</sup>, in the final least-square refinement cycles on *F*<sup>2</sup>, the model converged to *R*<sub>1</sub> = 0.0447, *wR*<sub>2</sub> = 0.1096, and GOF = 1.037 for 3190 reflections. Data CCDC 927191.

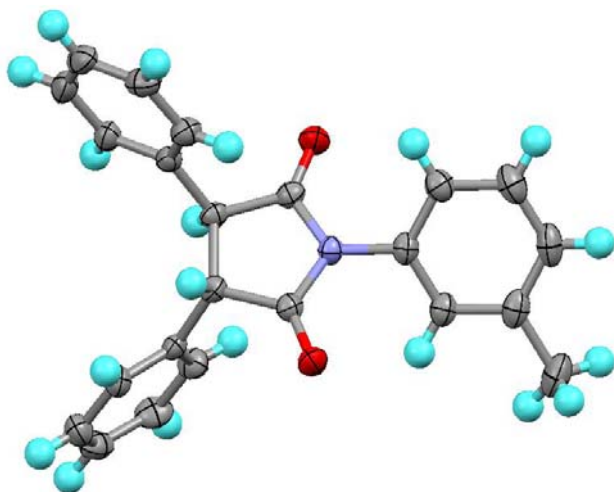

**Figure S5.** Ortep view of **3j** showing the atoms and thermal ellipsoids at 50% probability.

### Kinetic studies for racemization of **3d**, **3e**, and **3i**

Each optically active *trans*-3,4-diphenylsuccinimide **3** was dissolved into a CHCl<sub>3</sub> solution (5.0 × 10<sup>-2</sup> mol L<sup>-1</sup>) containing catalytic amount of DBU and the change of optical rotation was monitored by an DIP 370 polarimeter (JASCO) at 20 °C. The activation parameters were obtained from the Eyring equation. The first-order kinetic plots of the decay profile angle of rotation was shown as a plot of ln(*ee*) versus time (eq. 1), and the rate of racemization (*k*<sub>rac</sub>) was calculated from the slope of the line. The free energy barrier (Δ*G*<sup>‡</sup>) for racemization is calculated according to the Eyring equation (eq. 2), and then half-life were calculated according to equation (eq. 3).

$$\ln(ee) = k_{\text{rac}} t \quad (\text{eq. 1})$$

$$k_{\text{rac}} = \left( \frac{kT}{h} \right) \exp(-\Delta G^{\ddagger} / RT) \quad (\text{eq. 2})$$

$$t_{1/2} = \ln 2 / 2k_{\text{rac}} \quad (\text{eq. 3})$$

*k*<sub>rac</sub> : rate of racemization, *h* : Planck constant, *k* : Boltzmann constant, *R* : gas constant, *T* : temperature



**Table S1.** Kinetic parameters for racemization of *trans*-3,4-diphenylsuccinimides **3d**, **3e**, **3i**<sup>a</sup>

| <i>trans</i> - <b>3</b> | DBU (eq) | <i>t</i> <sub>1/2</sub> (sec) | $\Delta G^\ddagger$ (kcal mol <sup>-1</sup> ) |
|-------------------------|----------|-------------------------------|-----------------------------------------------|
| <b>3d</b>               | 0.10     | 120                           | 20.6                                          |
| <b>3e</b>               | 0.10     | 186                           | 20.8                                          |
| <b>3i</b>               | 0.05     | 99                            | 20.4                                          |

<sup>a</sup>Measurement conditions: 5.0 x 10<sup>-2</sup> mol L<sup>-1</sup> of each succinimide in CHCl<sub>3</sub> at 20 °C.

### Method for crystallization

#### Crystallization of achiral *cis*-**2** or racemic *trans*-**3** by evaporating solvent (method A):<sup>[S2]</sup>

A mixed solution of chloroform (2 ml) and hexane (1 ml) containing 30 mg of *cis*-**2d**, *cis*-**2e**, or racemic *trans*-**3i** and 0.05 - 0.10 mol % of DBU was stirred in a test tube or a vial at room temperature until all solvent evaporated. After the solidified substrate was dissolved in chloroform and DBU was removed through short silica gel column, the enantiomer excess (ee) of *trans*-**3** was analysed by HPLC using chiral column (Daicel Ind. CHIRALPAK AD-H for **3d**; CHIRALPAK IA-3 for **3e**; CHIRALPAK IA for **3i**).

### References

- [S1] 3,4-Diphenylmaleimides were synthesized from 3,4-diphenylmaleic anhydride and corresponding amines. (a) Zehavi, U. *J. Org. Chem.* **1976**, 2821-2825. (b) Aoyama, H; Sakamoto, M.; Omote, Y. *J. Am. Chem. Soc.* **1980**, 102, 6902-6903.
- [S2] Yagishita, F.; Ishikawa, H.; Onuki, T.; Hachiya, S.; Mino, T.; Sakamoto, M. *Angew. Chem. Int. Ed.* **2012**, 51, 13023-13025.

Figure S7. <sup>1</sup>H NMR of *cis*-*N*-propyl-3,4-diphenylsuccinimide **2d**

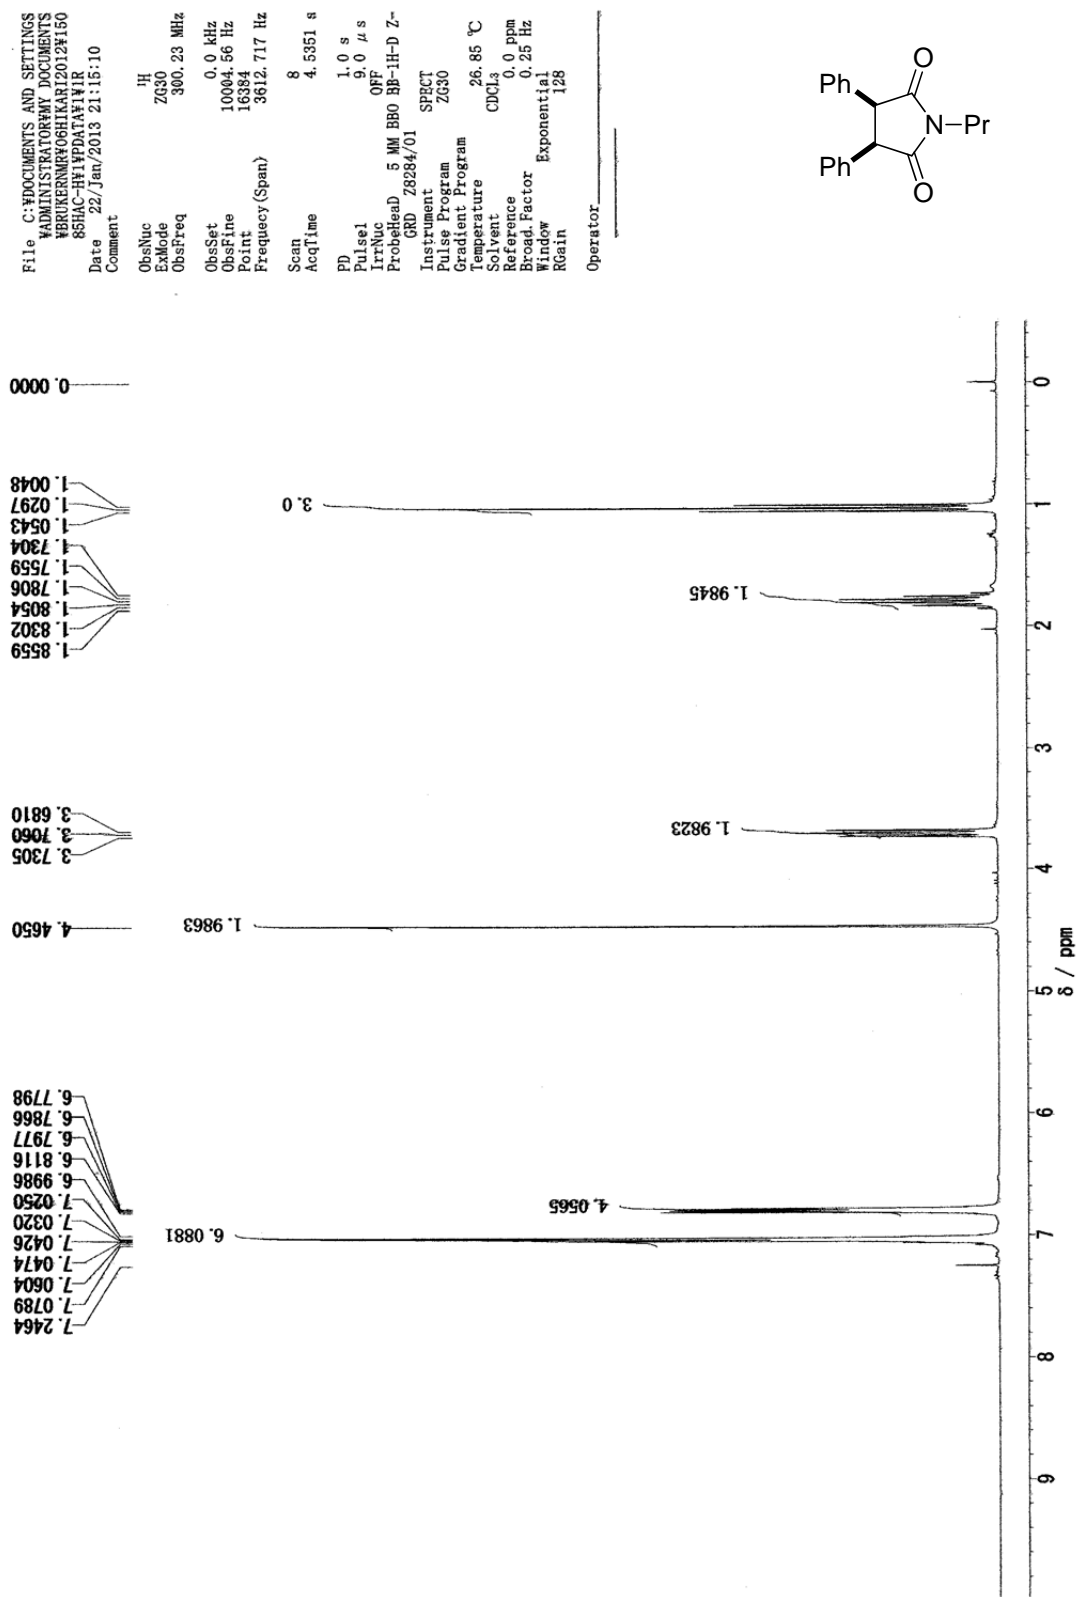

Figure S8. <sup>13</sup>C NMR of *cis*-*N*-propyl-3,4-diphenylsuccinimide **2d**

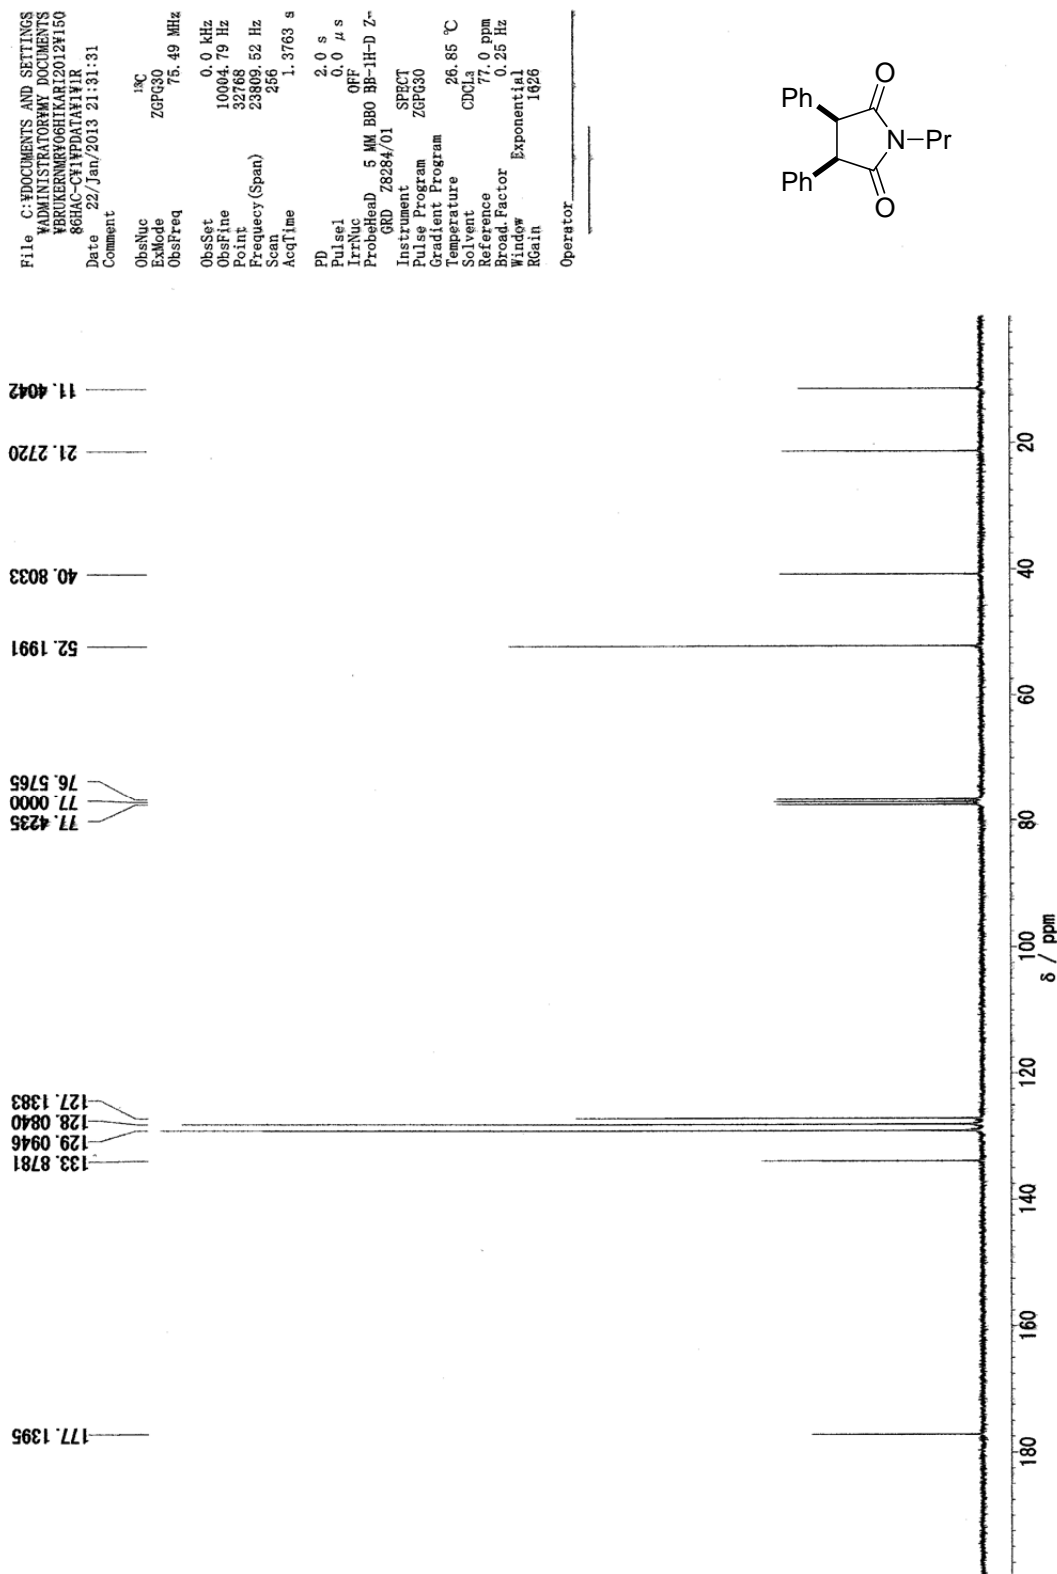

Figure S9. <sup>1</sup>H NMR spectrum for *cis*-*N*-isopropyl-3,4-diphenylsuccinimide **2e**

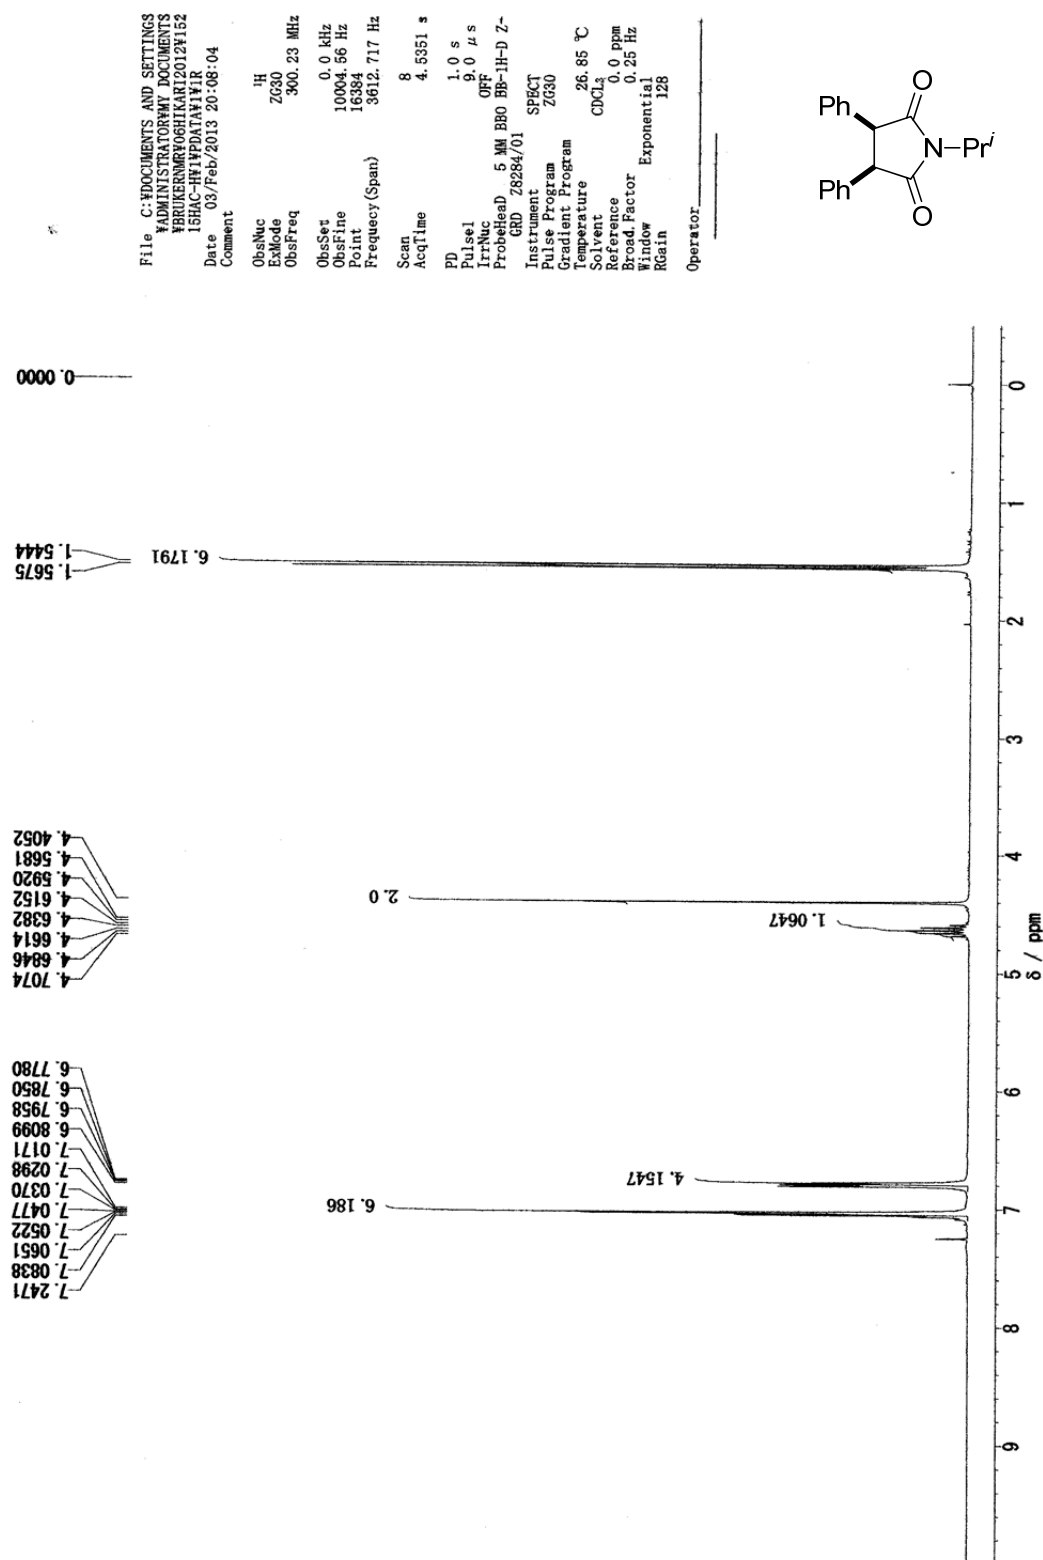

Figure S10. <sup>13</sup>C NMR spectrum for *cis*-*N*-isopropyl-3,4-diphenylsuccinimide 2e

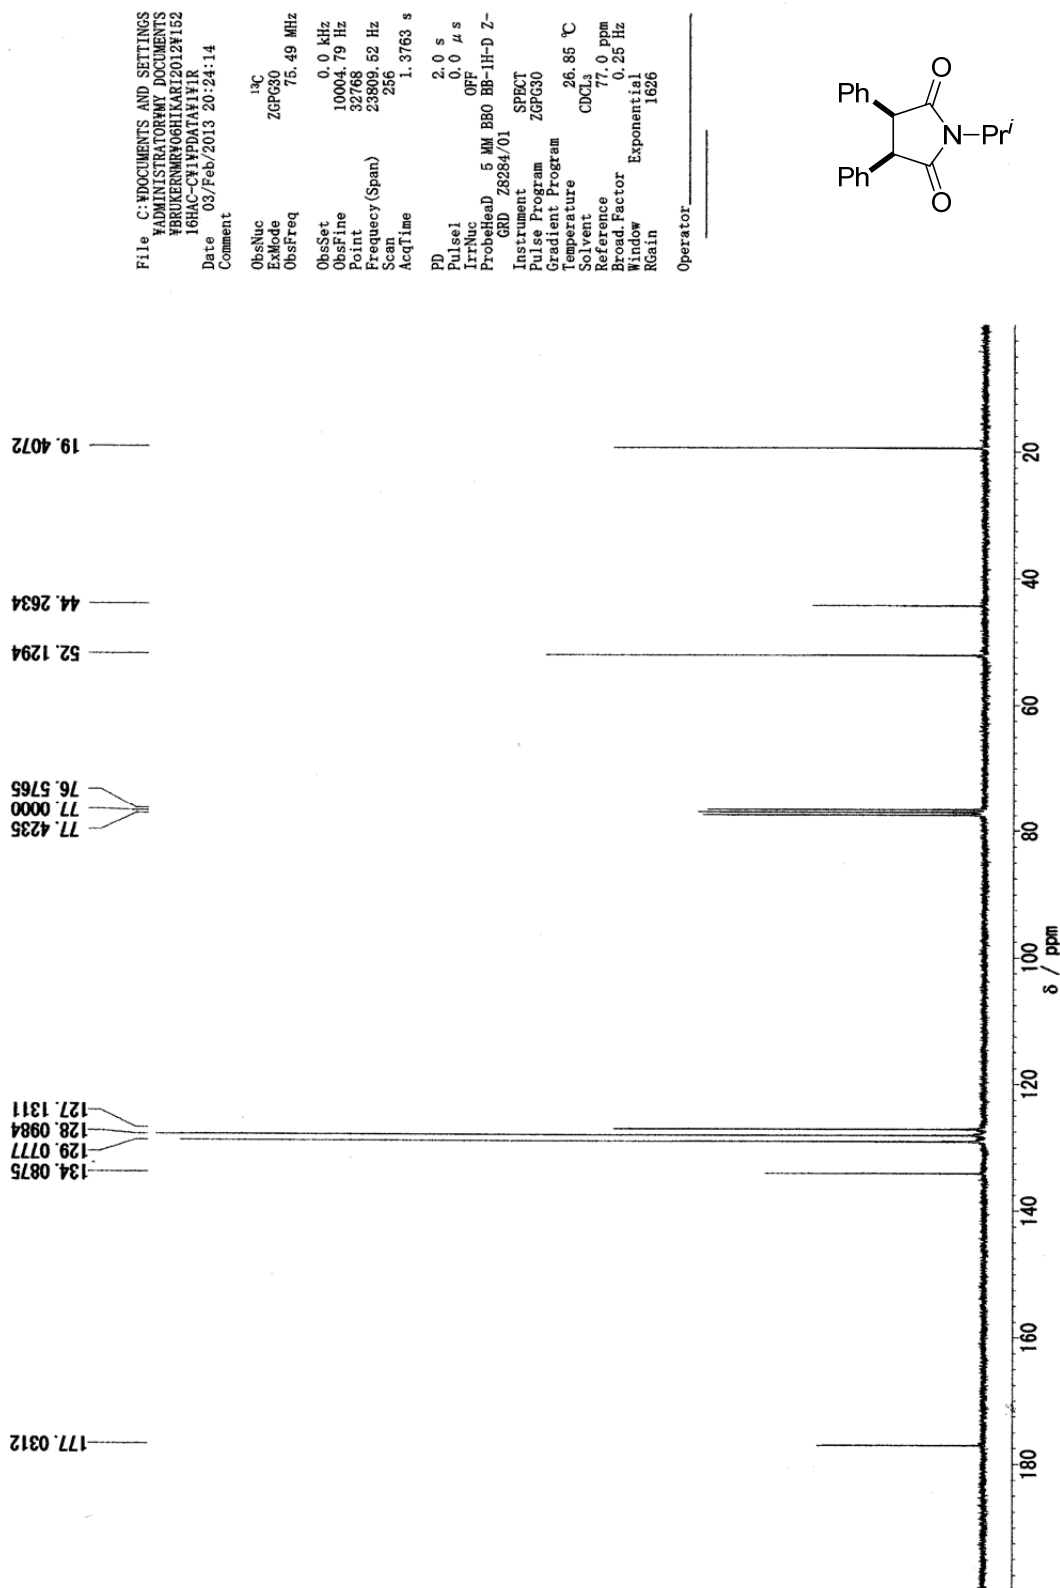

Figure S11. <sup>1</sup>H NMR spectrum for *trans*-3,4-diphenylsuccinimide 3a

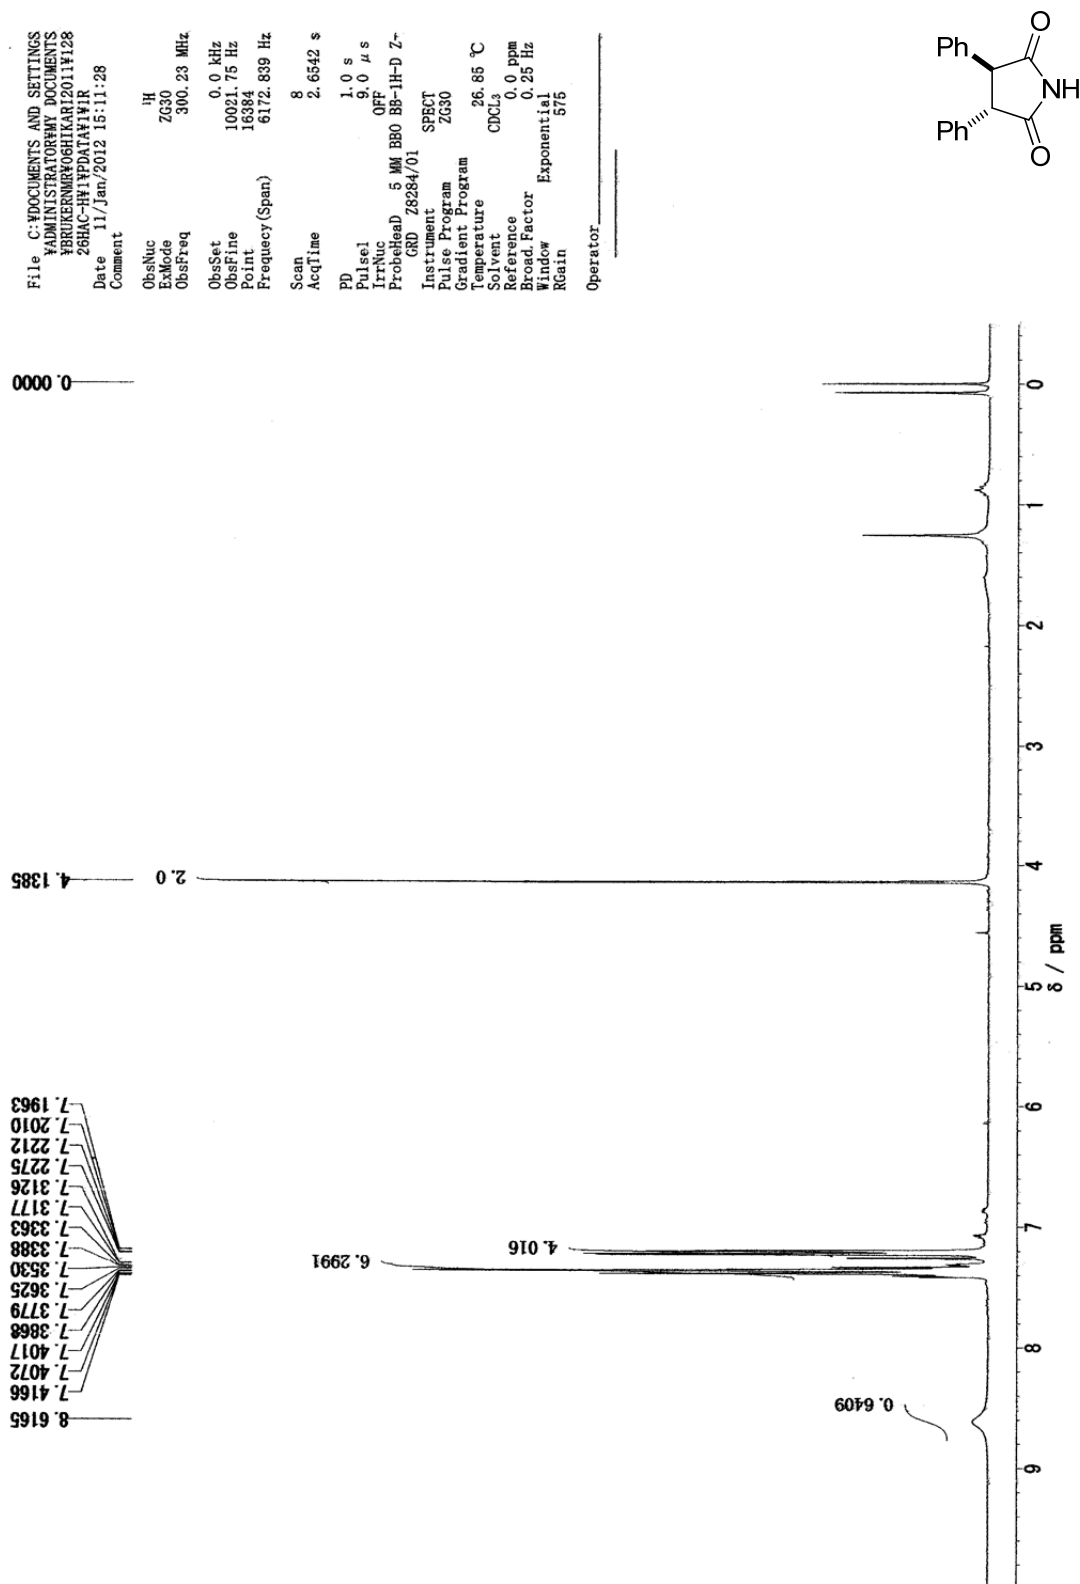

Figure S12. <sup>13</sup>C NMR spectrum for *trans*-3,4-diphenylsuccinimide 3a

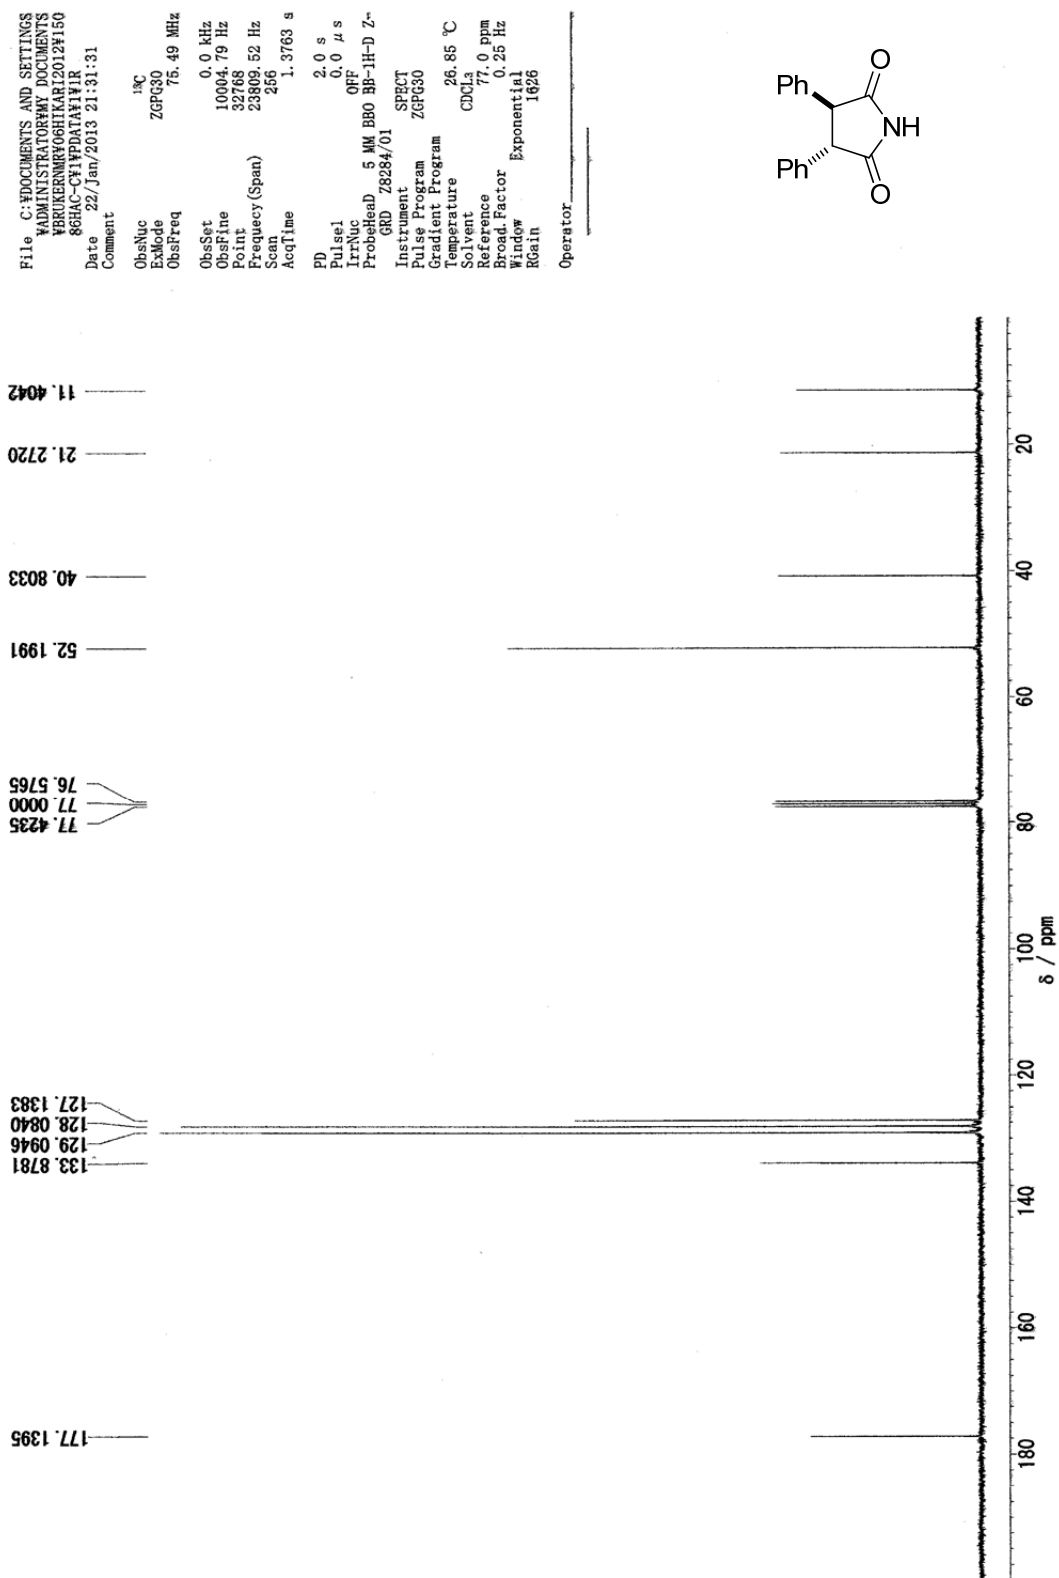

Figure S13. <sup>1</sup>H NMR spectrum for *trans*-*N*-methyl-3,4-diphenylsuccinimide 3b

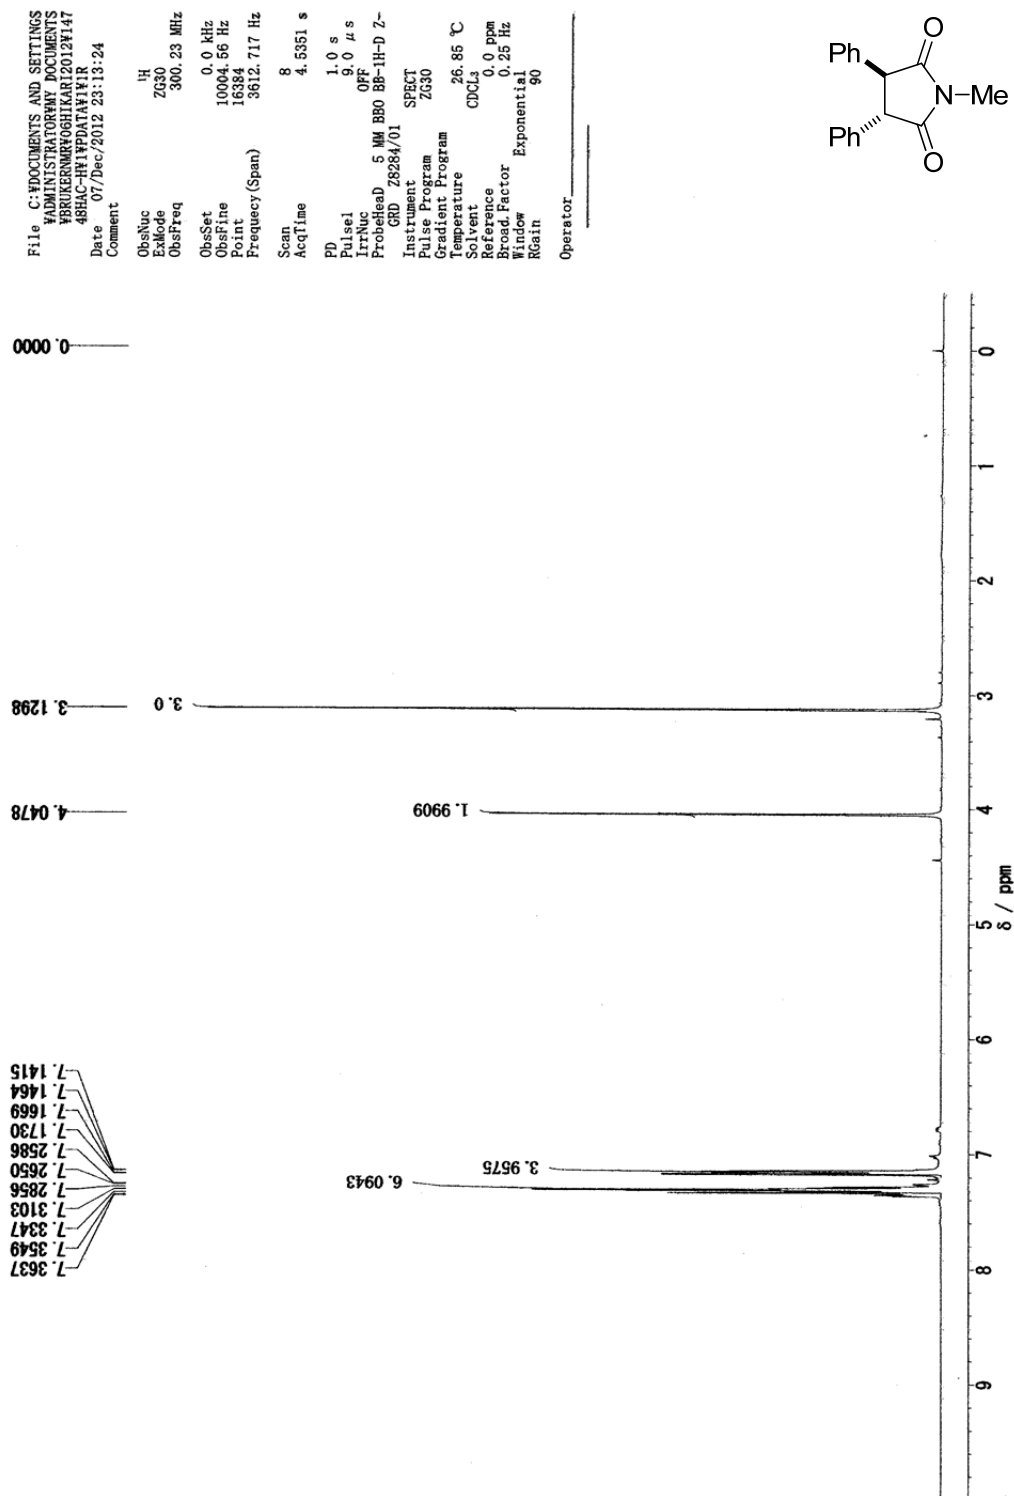



Figure S14.  $^{13}\text{C}$  NMR spectrum for *trans*-*N*-methyl-3,4-diphenylsuccinimide **3b**

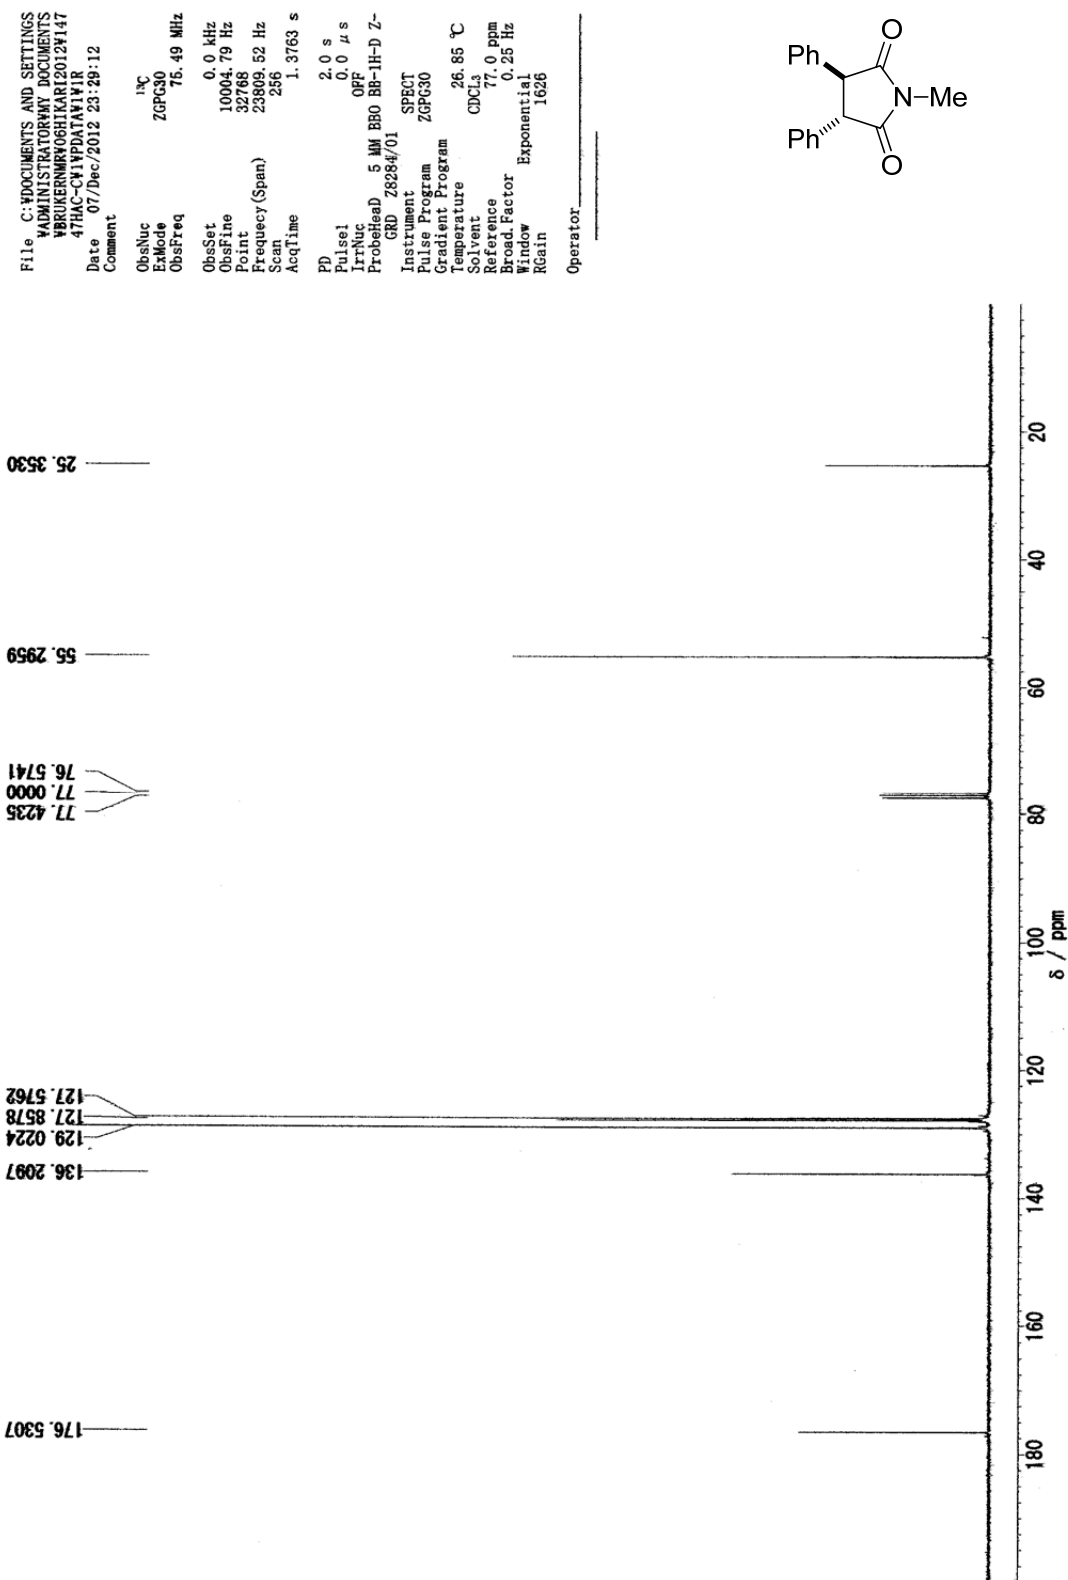

Figure S15. <sup>1</sup>H NMR spectrum for *trans*-*N*-ethyl-3,4-diphenylsuccinimide **3c**

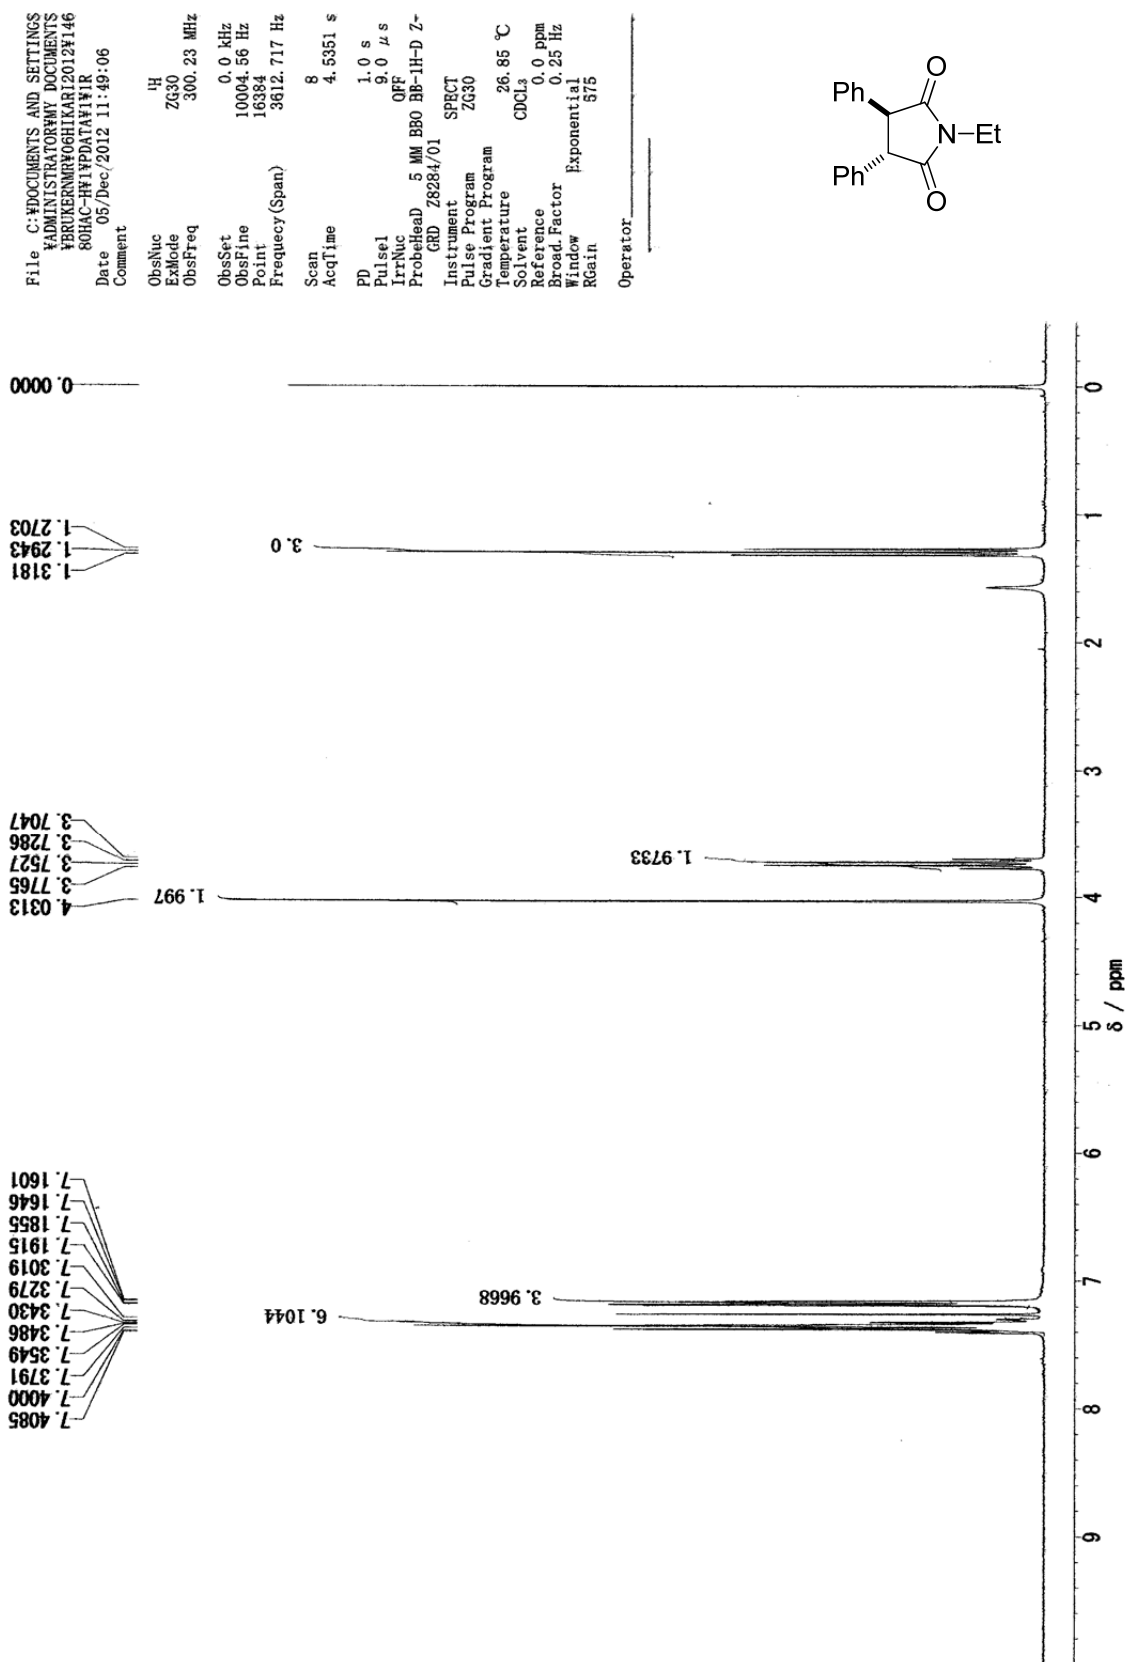

Figure S16.  $^{13}\text{C}$  NMR spectrum for *trans*-*N*-ethyl-3,4-diphenylsuccinimide **3c**

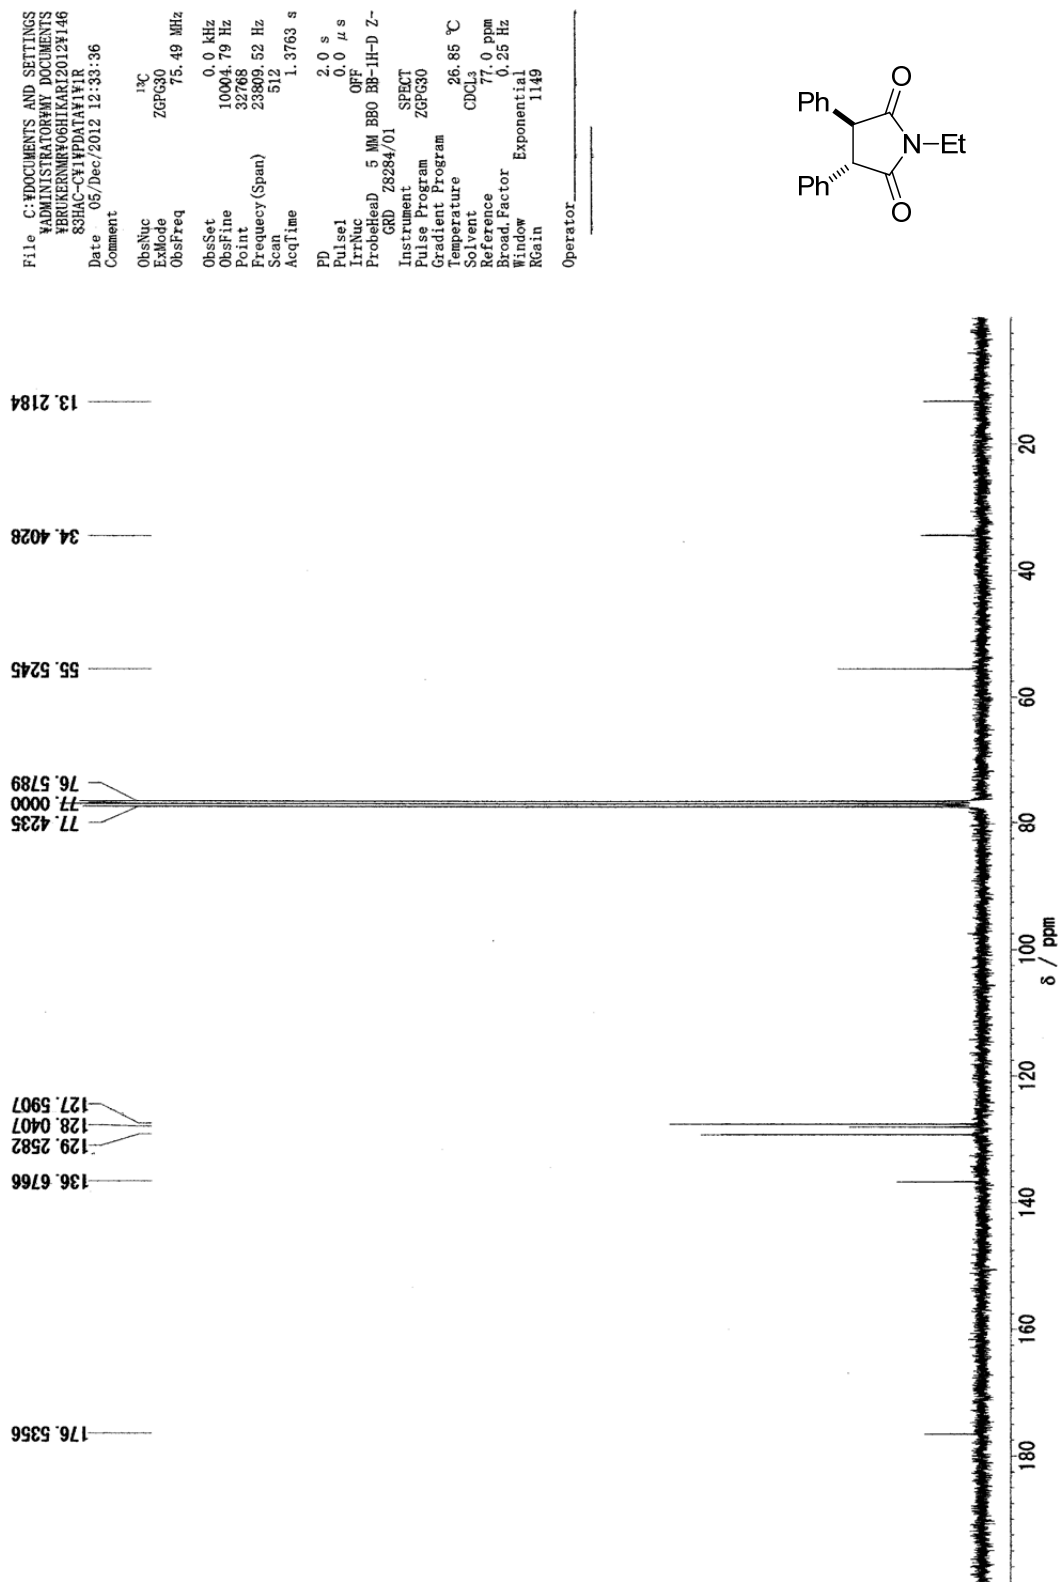

Figure S17. <sup>1</sup>H NMR spectrum for *trans*-*N*-propyl-3,4-diphenylsuccinimide 3d

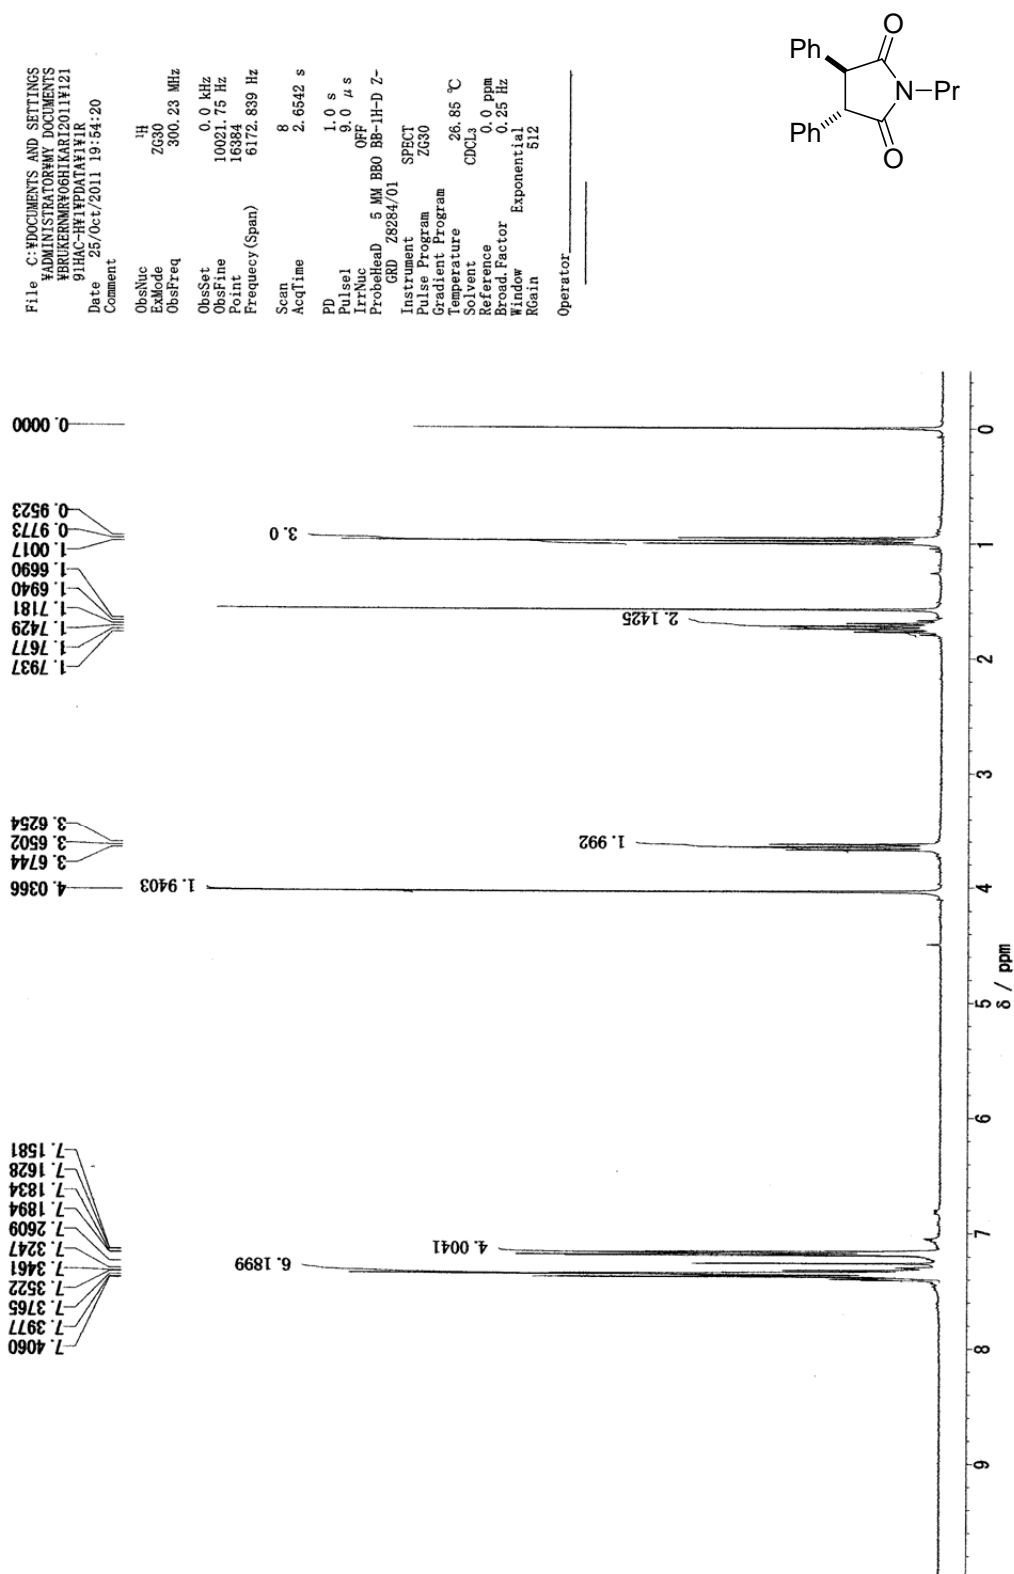

Figure S18.  $^{13}\text{C}$  NMR spectrum for *trans*-*N*-propyl-3,4-diphenylsuccinimide **3d**

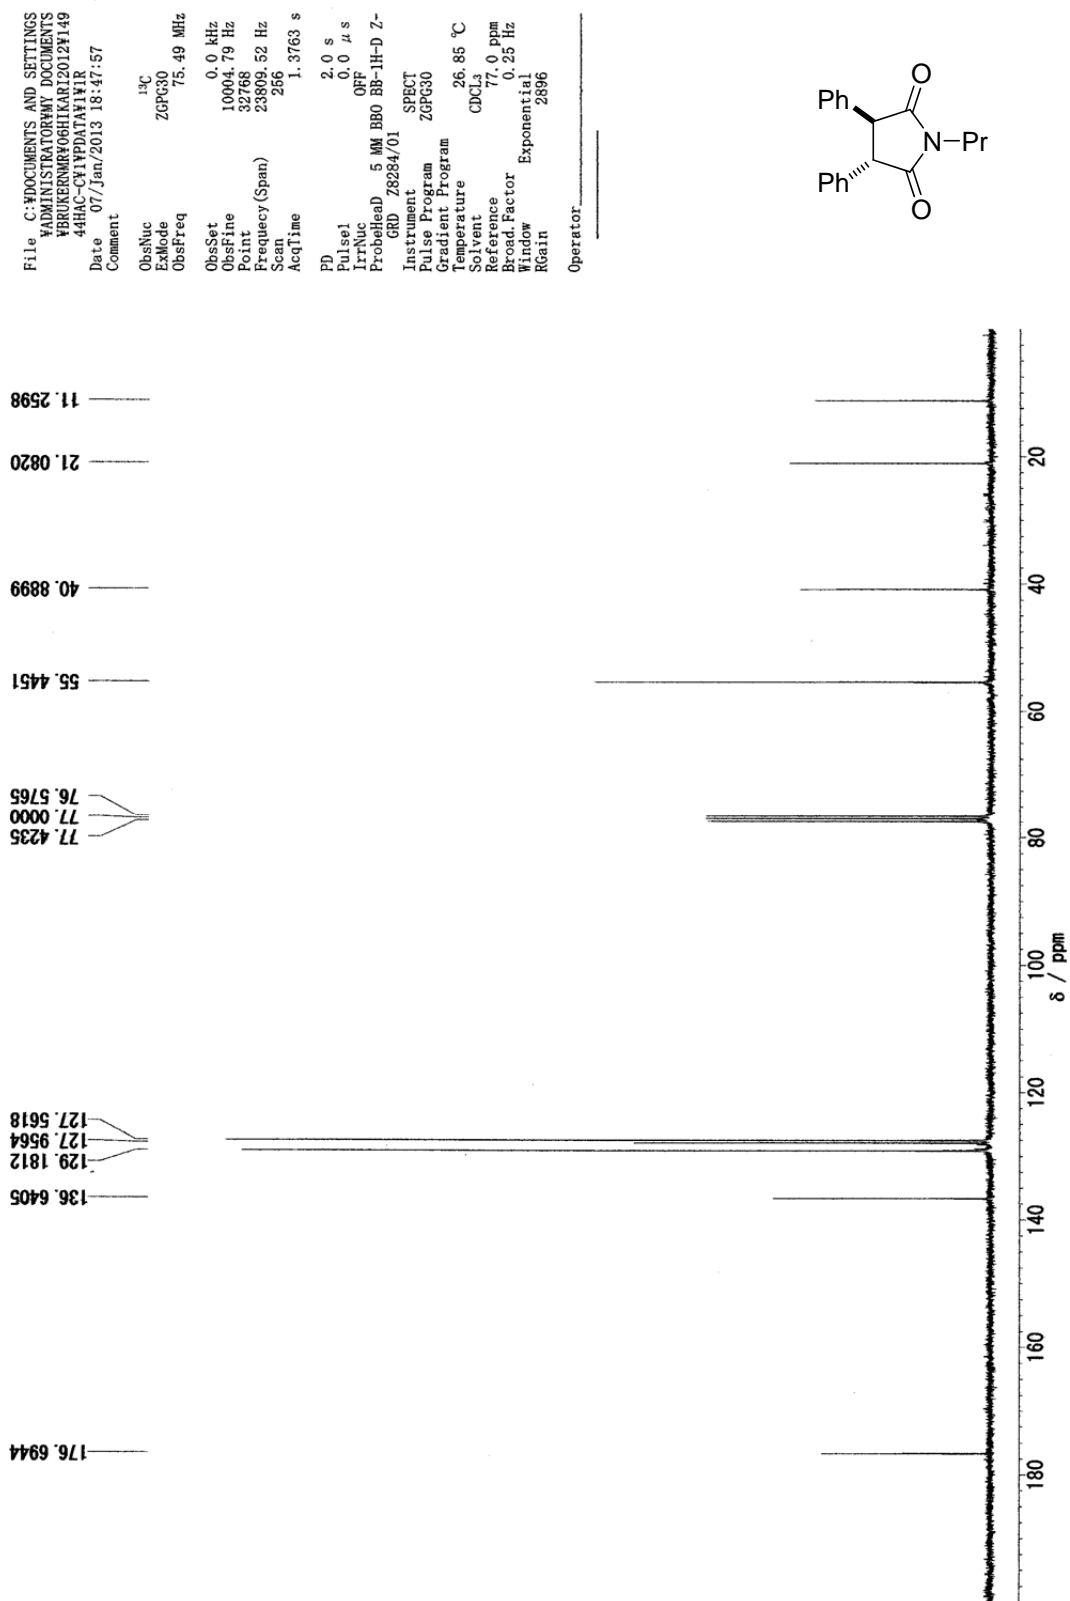

Figure S19. <sup>1</sup>H NMR spectrum for *trans*-*N*-isopropyl-3,4-diphenylsuccinimide **3e**

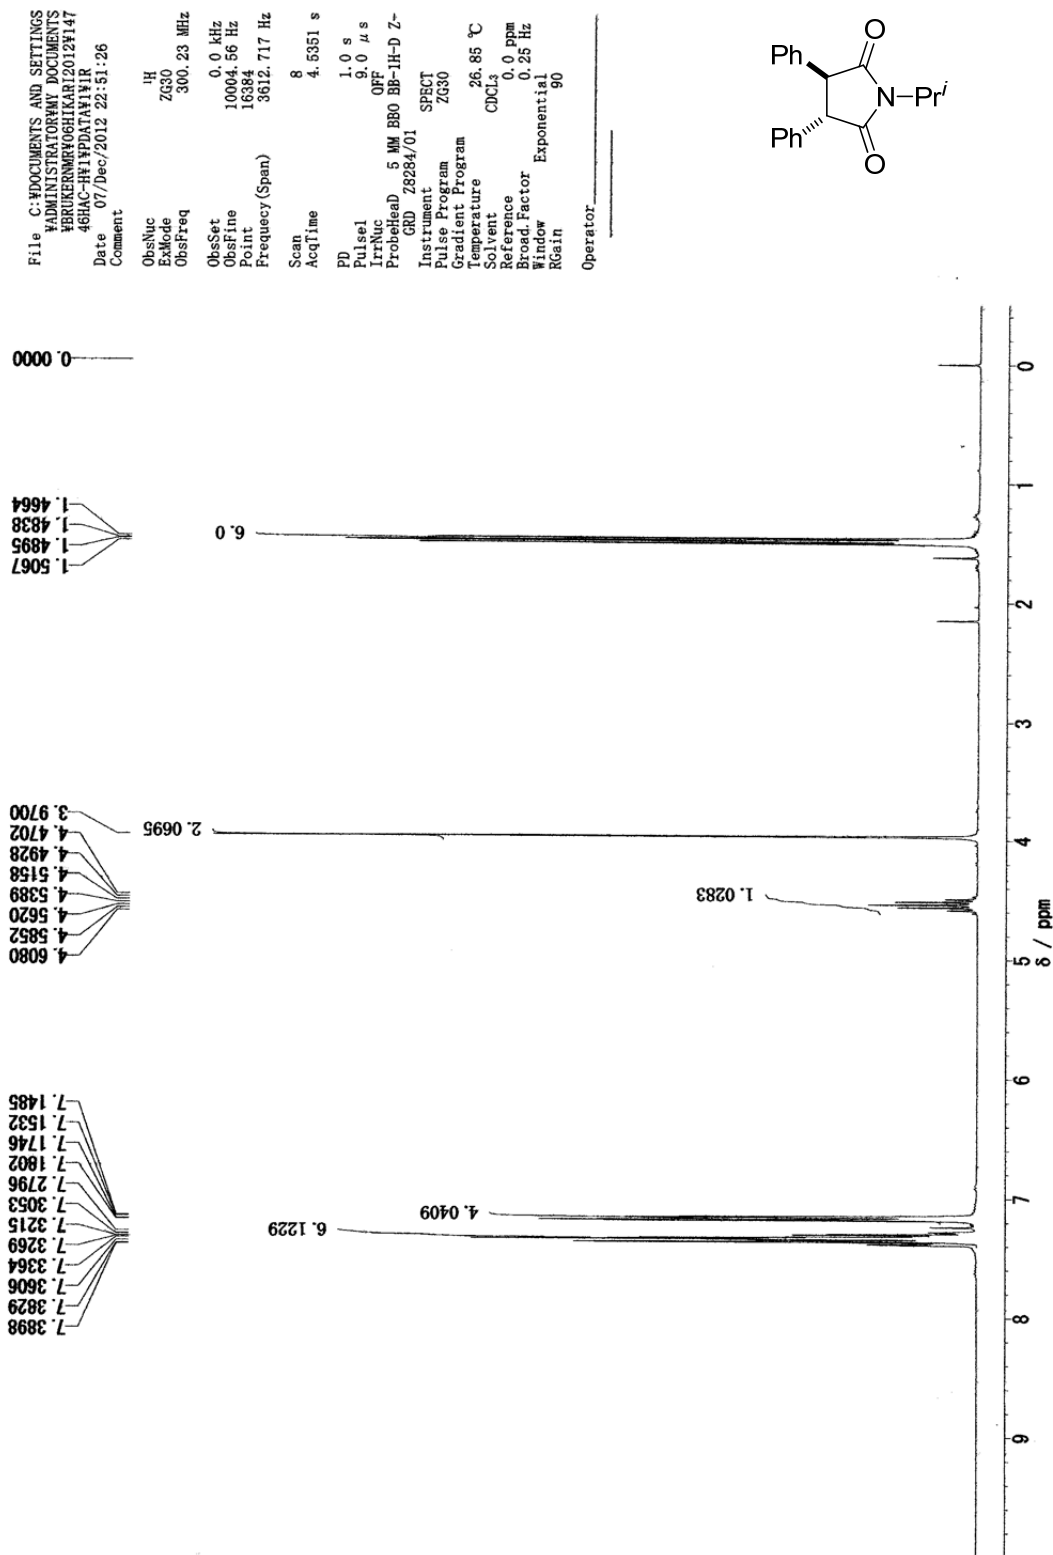

Figure S20.  $^{13}\text{C}$  NMR spectrum for *trans*-*N*-isopropyl-3,4-diphenylsuccinimide **3e**

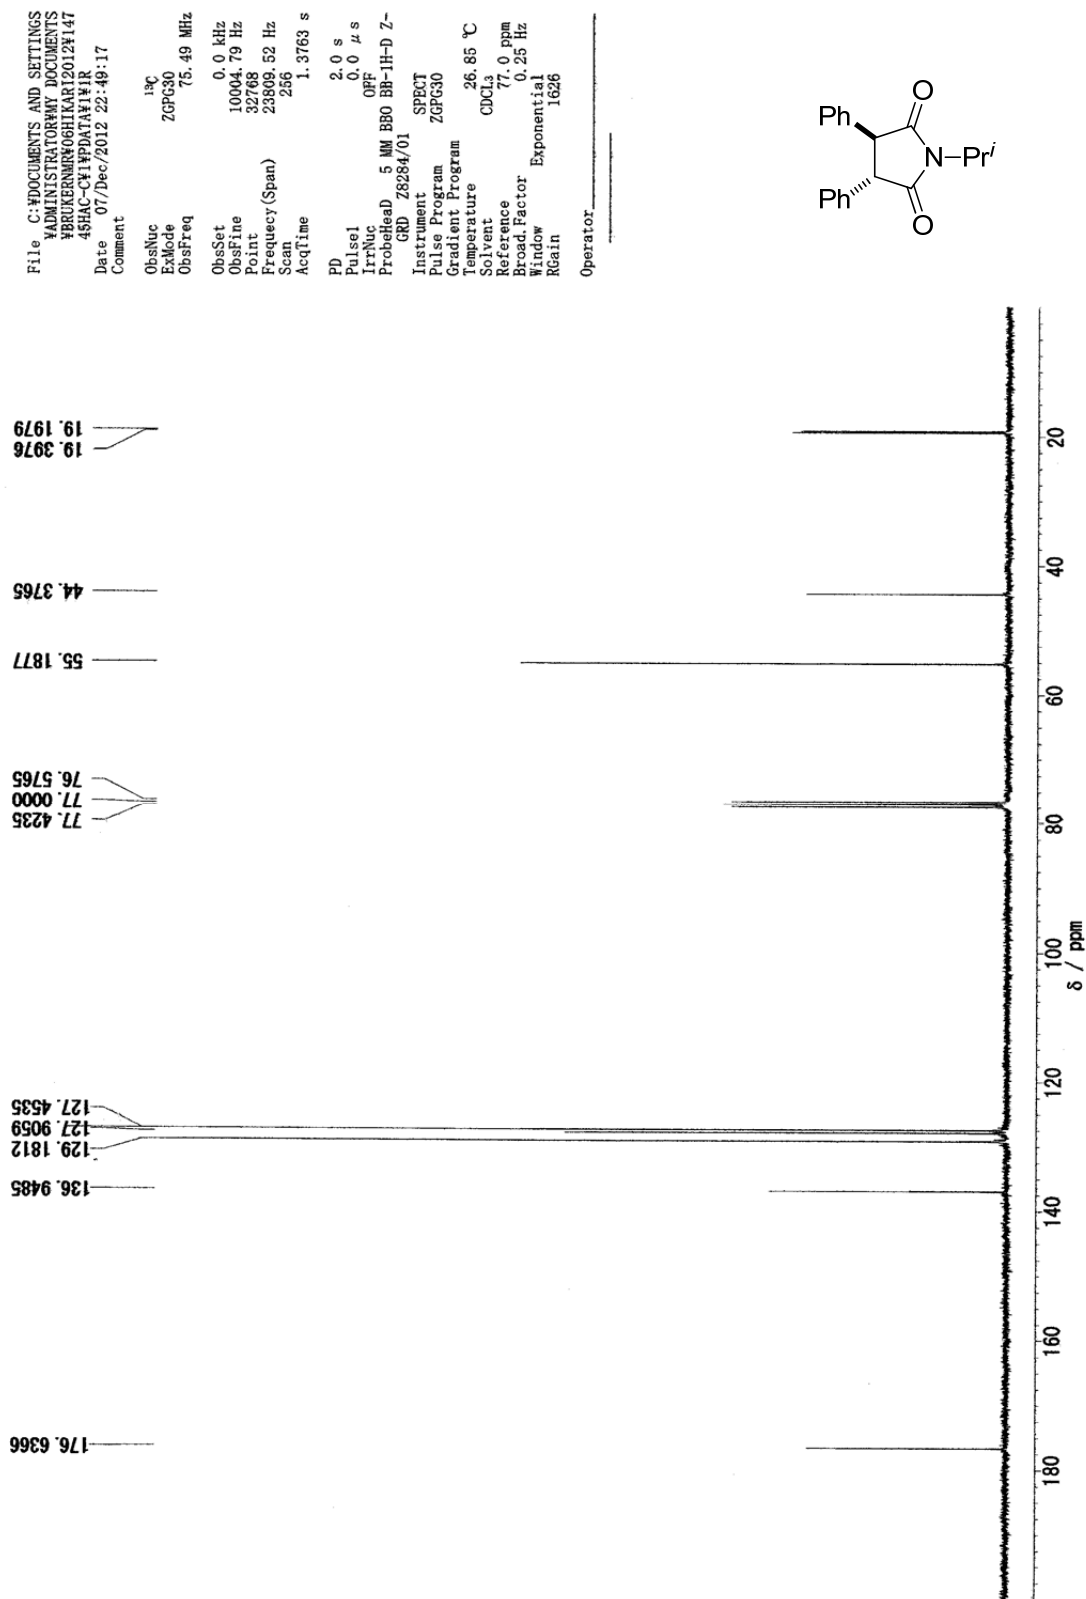

Figure S21. <sup>1</sup>H NMR spectrum for *trans*-*N*-benzyl-3,4-diphenylsuccinimide 3f

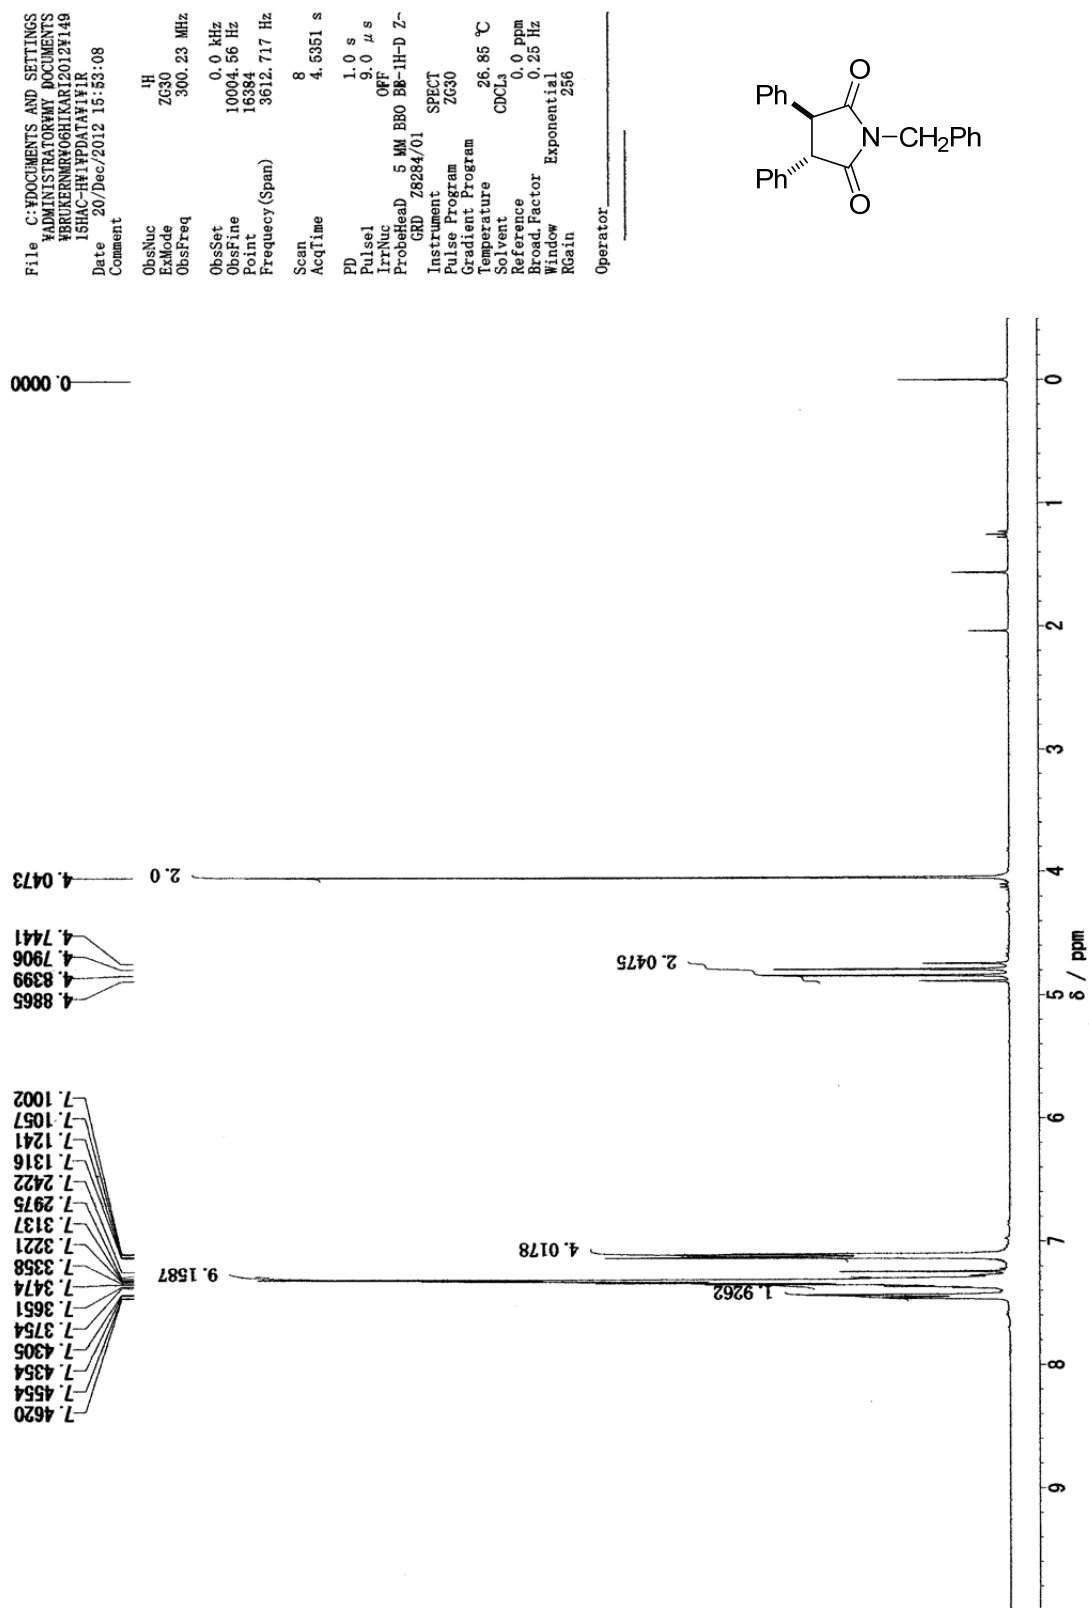



Figure S22. <sup>13</sup>C NMR spectrum for *trans*-*N*-benzyl-3,4-diphenylsuccinimide **3f**

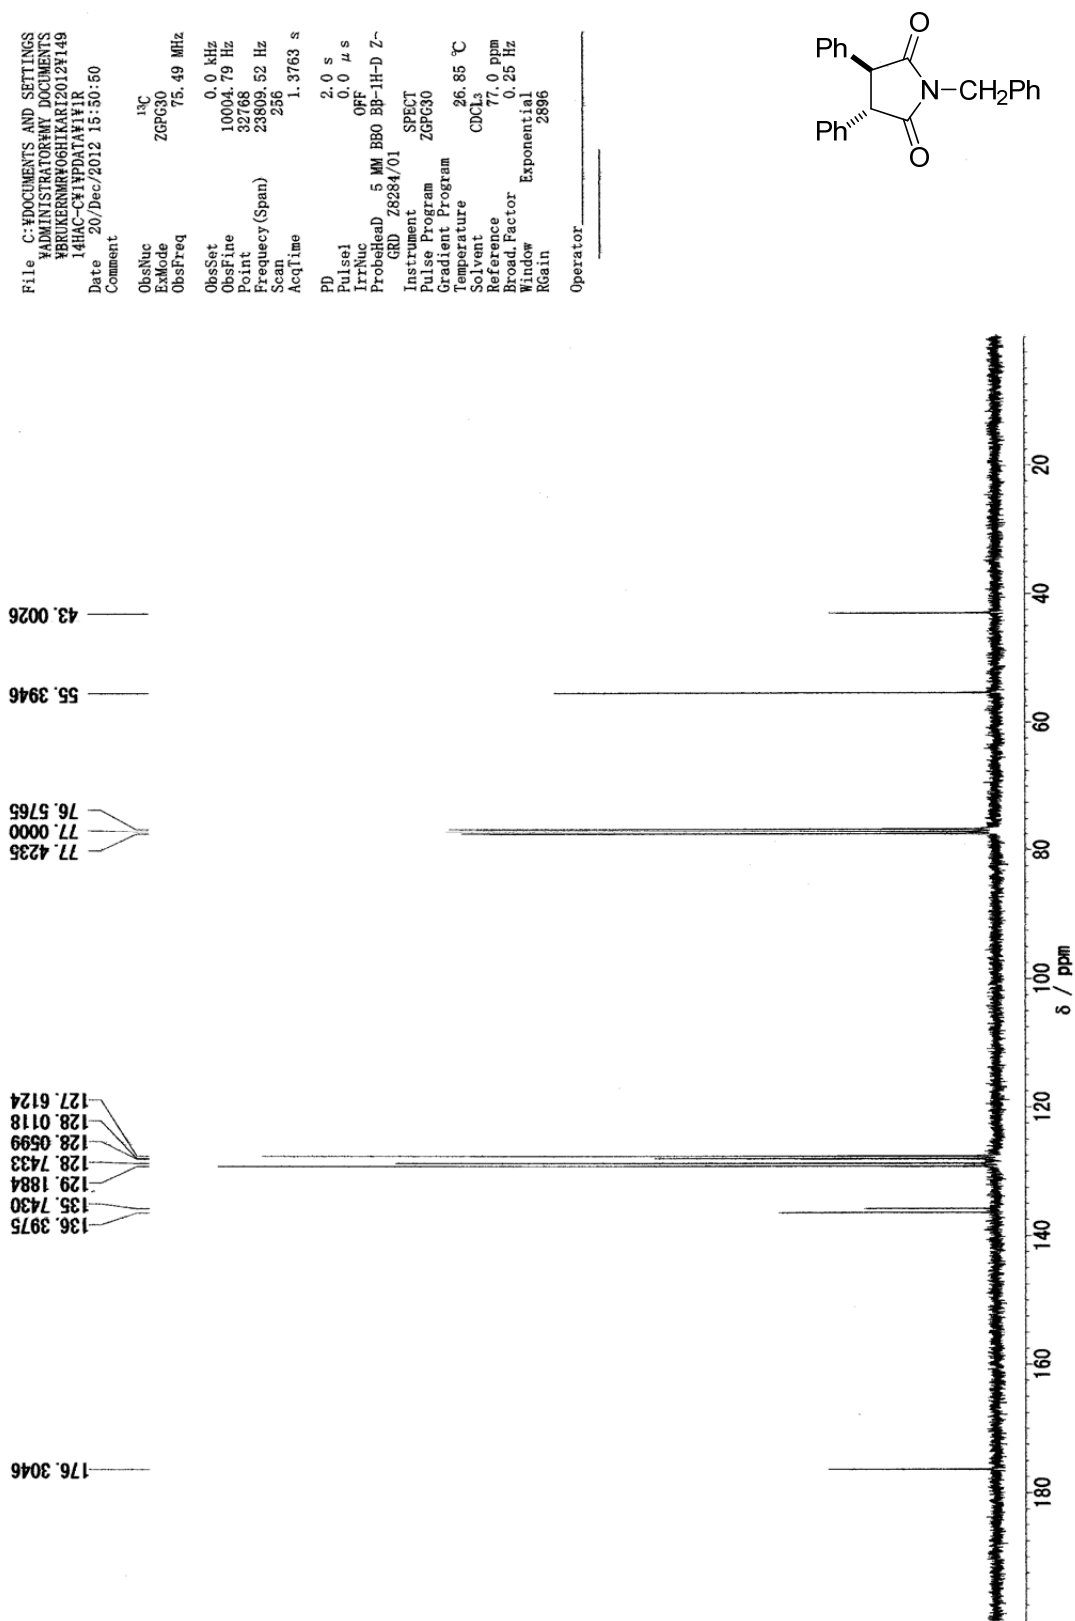

Figure S23. <sup>1</sup>H NMR spectrum for *trans*-*N*-phenethyl-3,4-diphenylsuccinimide **3g**

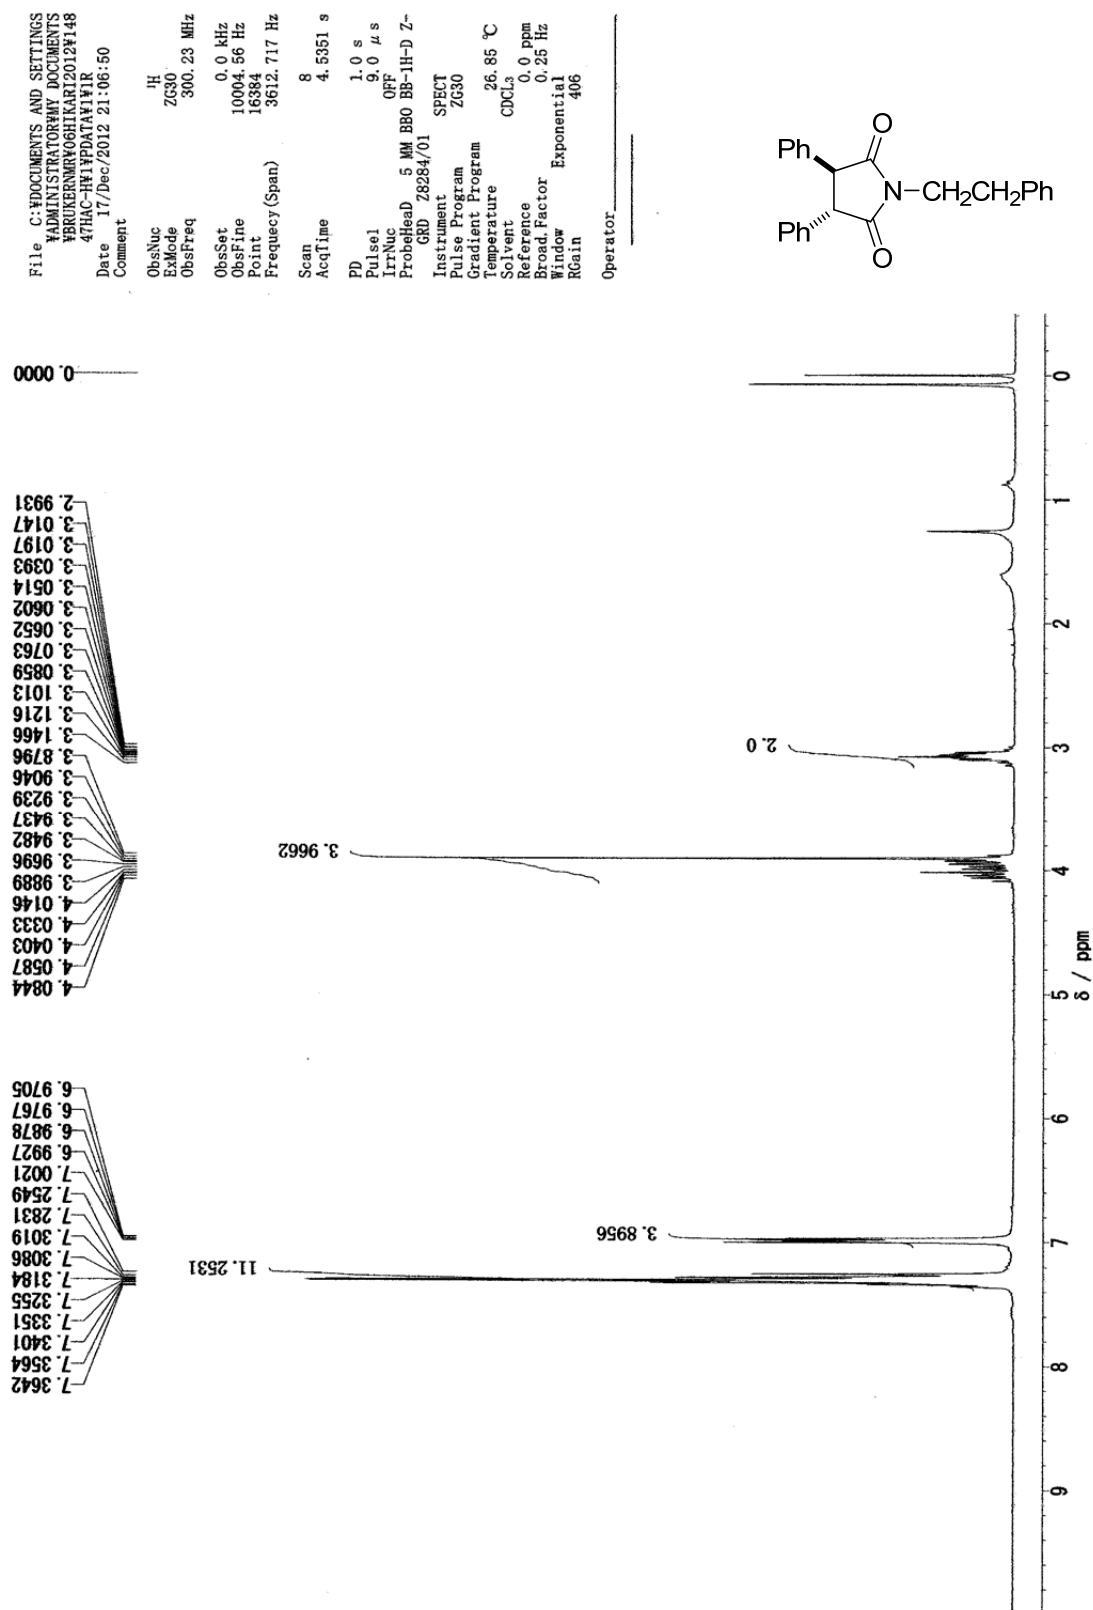

Figure S24. <sup>13</sup>C NMR spectrum for *trans*-*N*-phenyl-3,4-diphenylsuccinimide **3g**

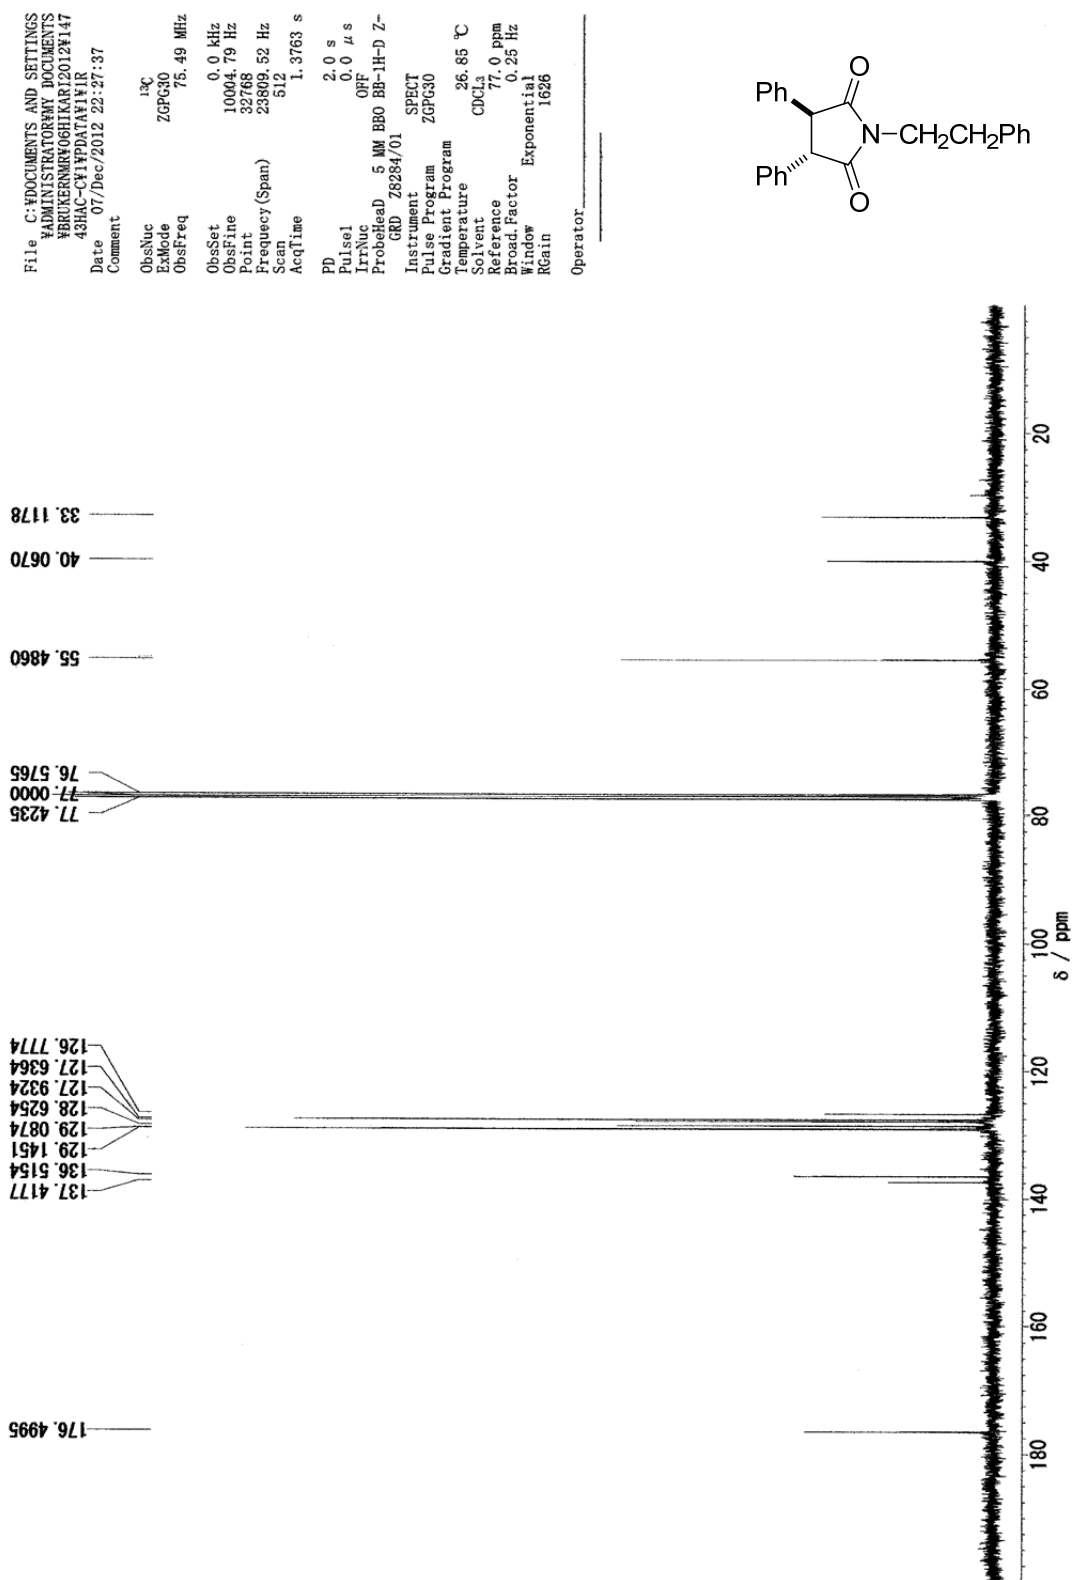

Figure S25. <sup>1</sup>H NMR spectrum for *trans*-*N*-phenyl-3,4-diphenylsuccinimide 3h

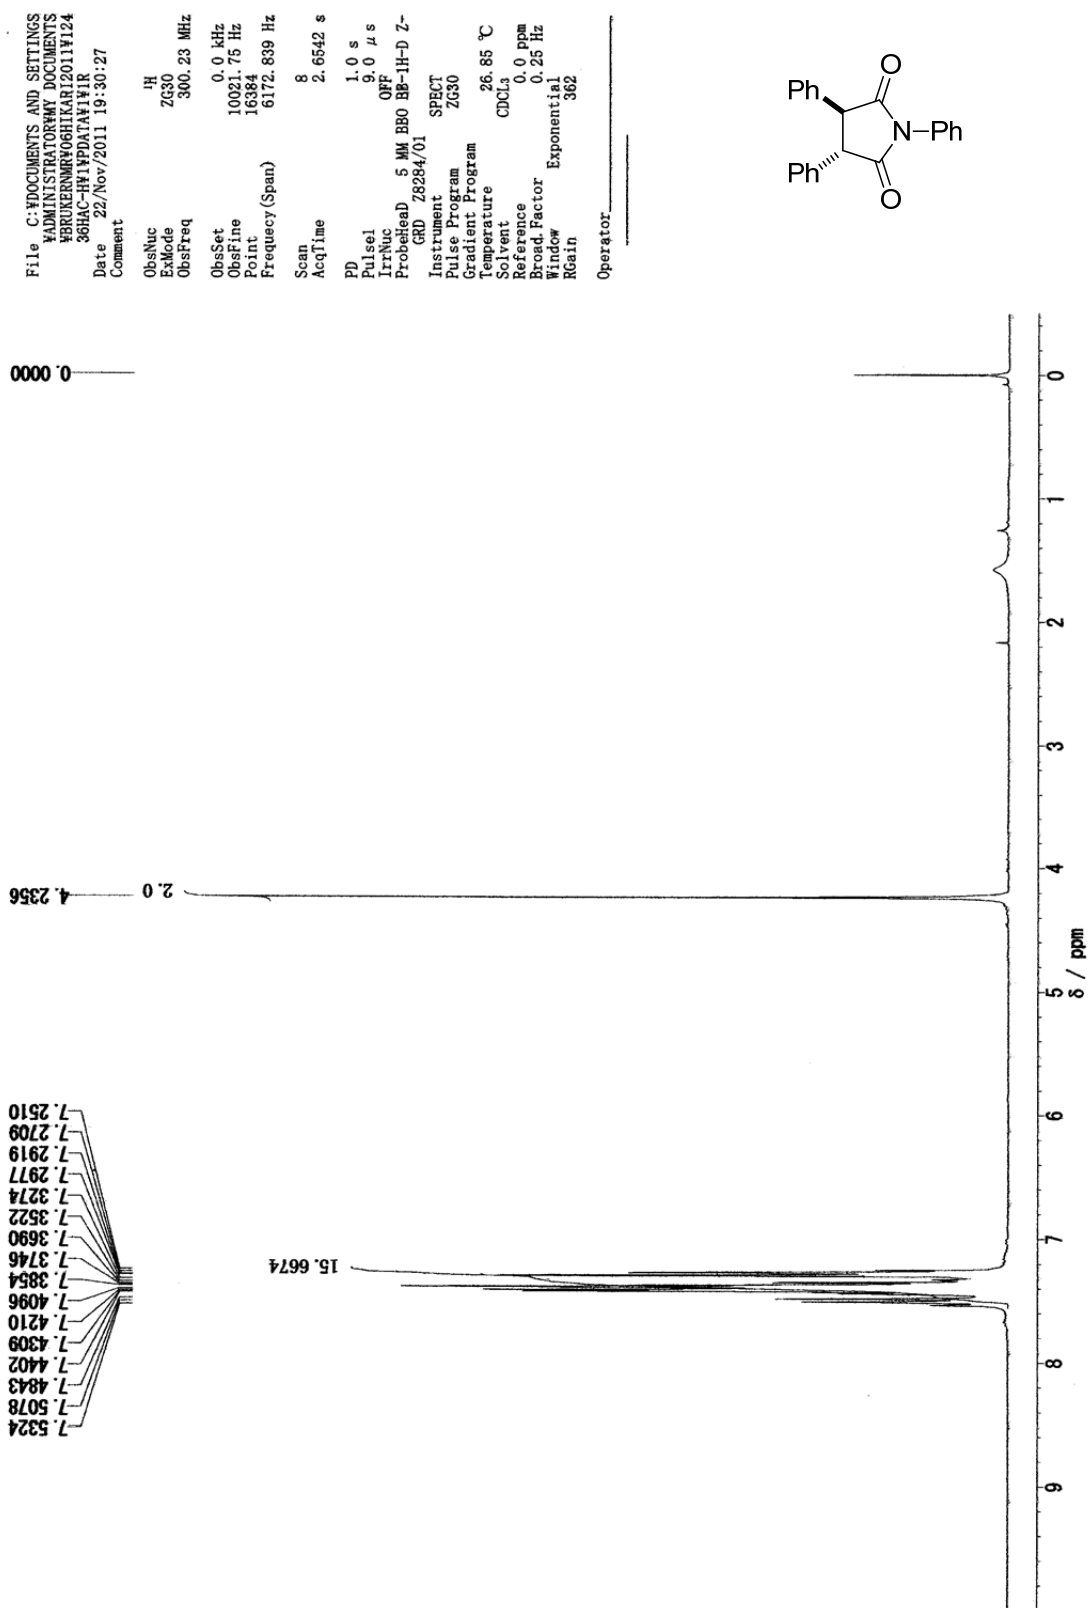

Figure S26.  $^{13}\text{C}$  NMR spectrum for *trans*-*N*-phenyl-3,4-diphenylsuccinimide **3h**

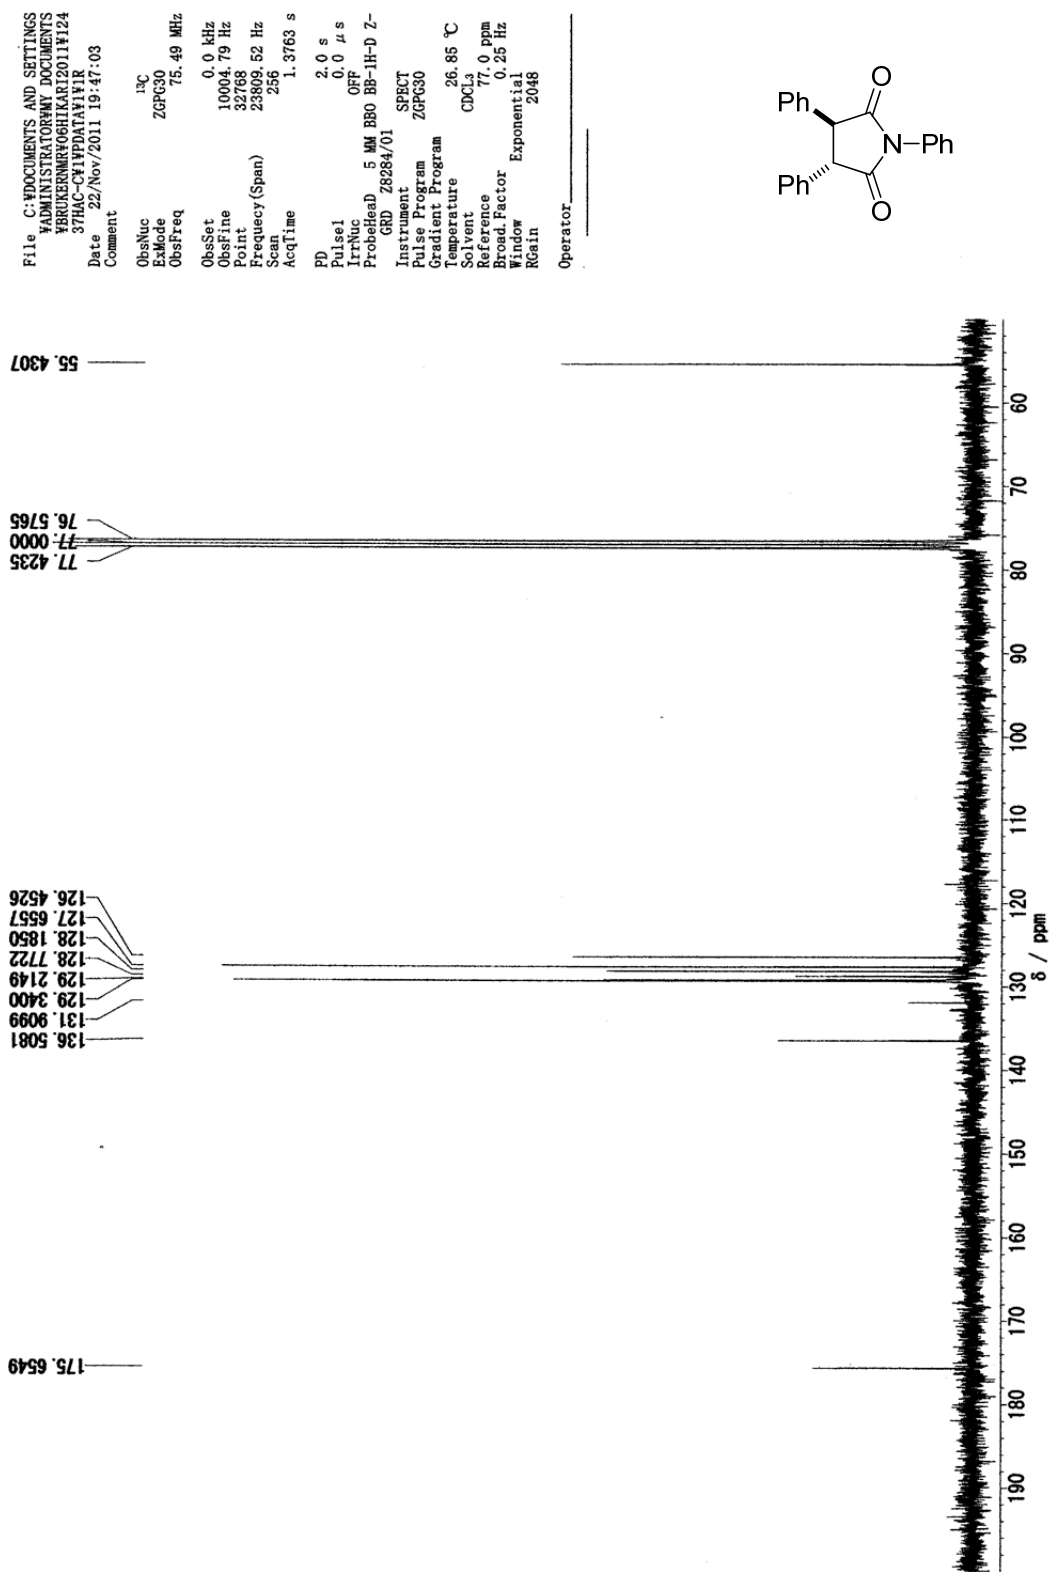

Figure S27. <sup>1</sup>H NMR spectrum for *trans*-*N*-(2-methylphenyl)-3,4-diphenylsuccinimide **3i**

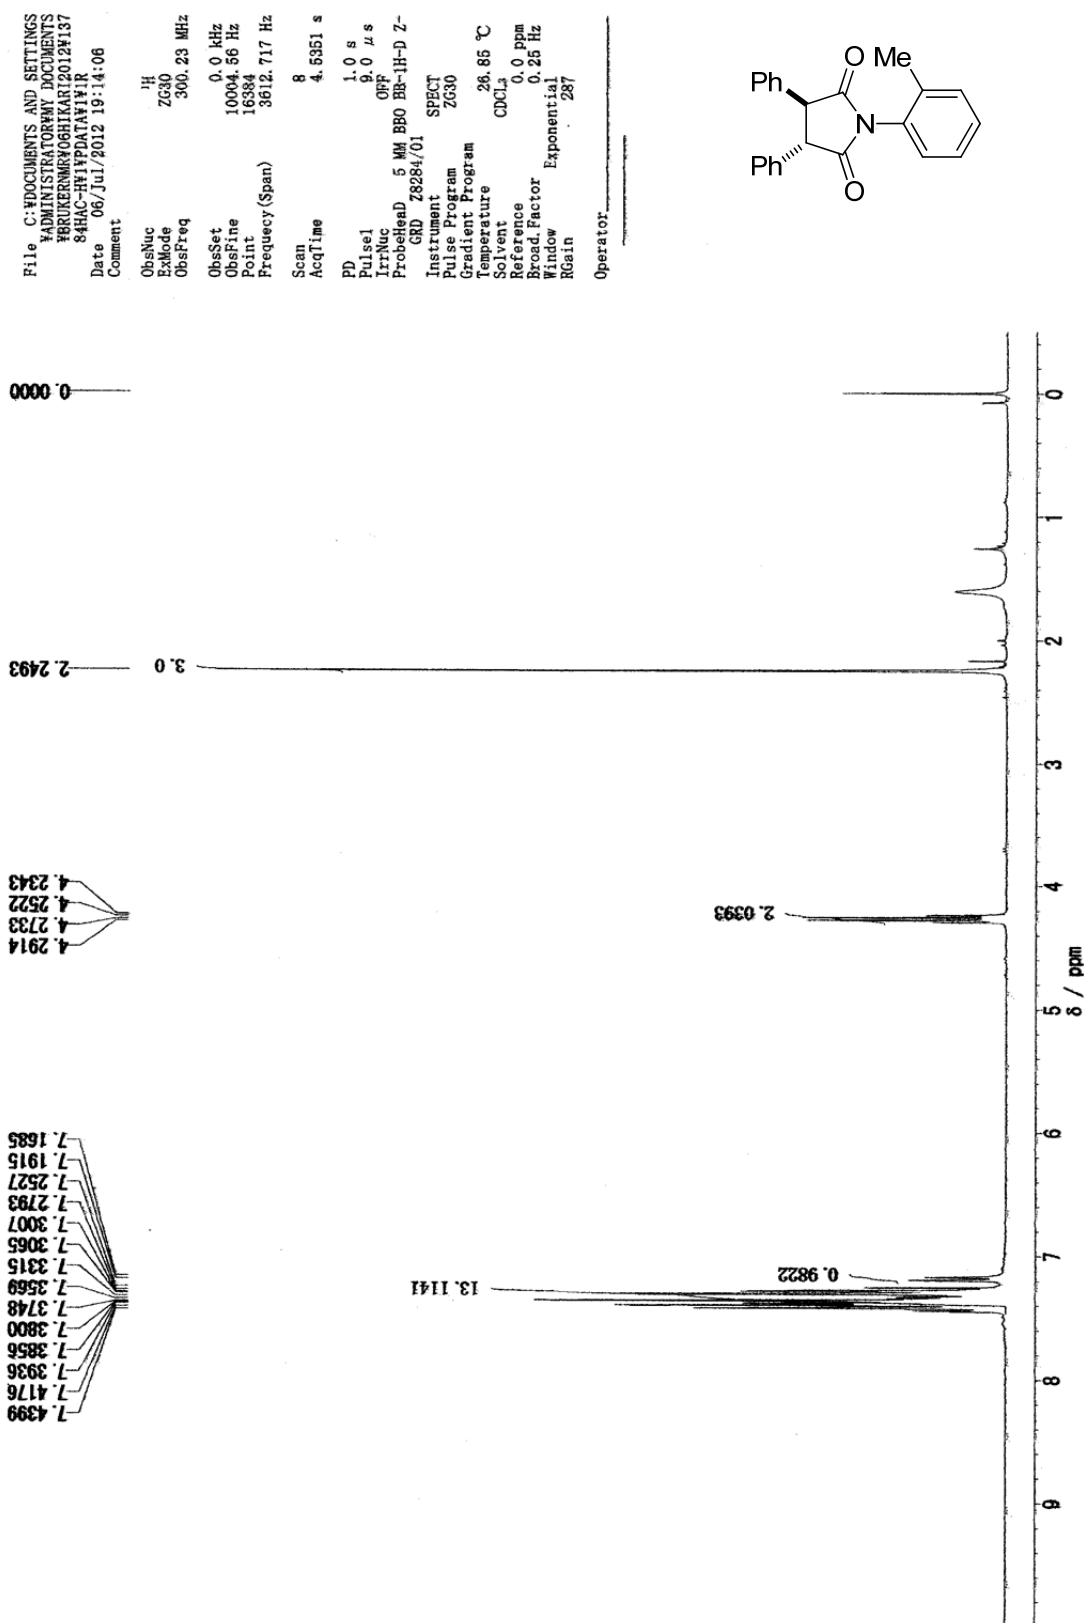

Figure S28. <sup>13</sup>C NMR spectrum for *trans*-*N*-(2-methylphenyl)-3,4-diphenylsuccinimide **3i**

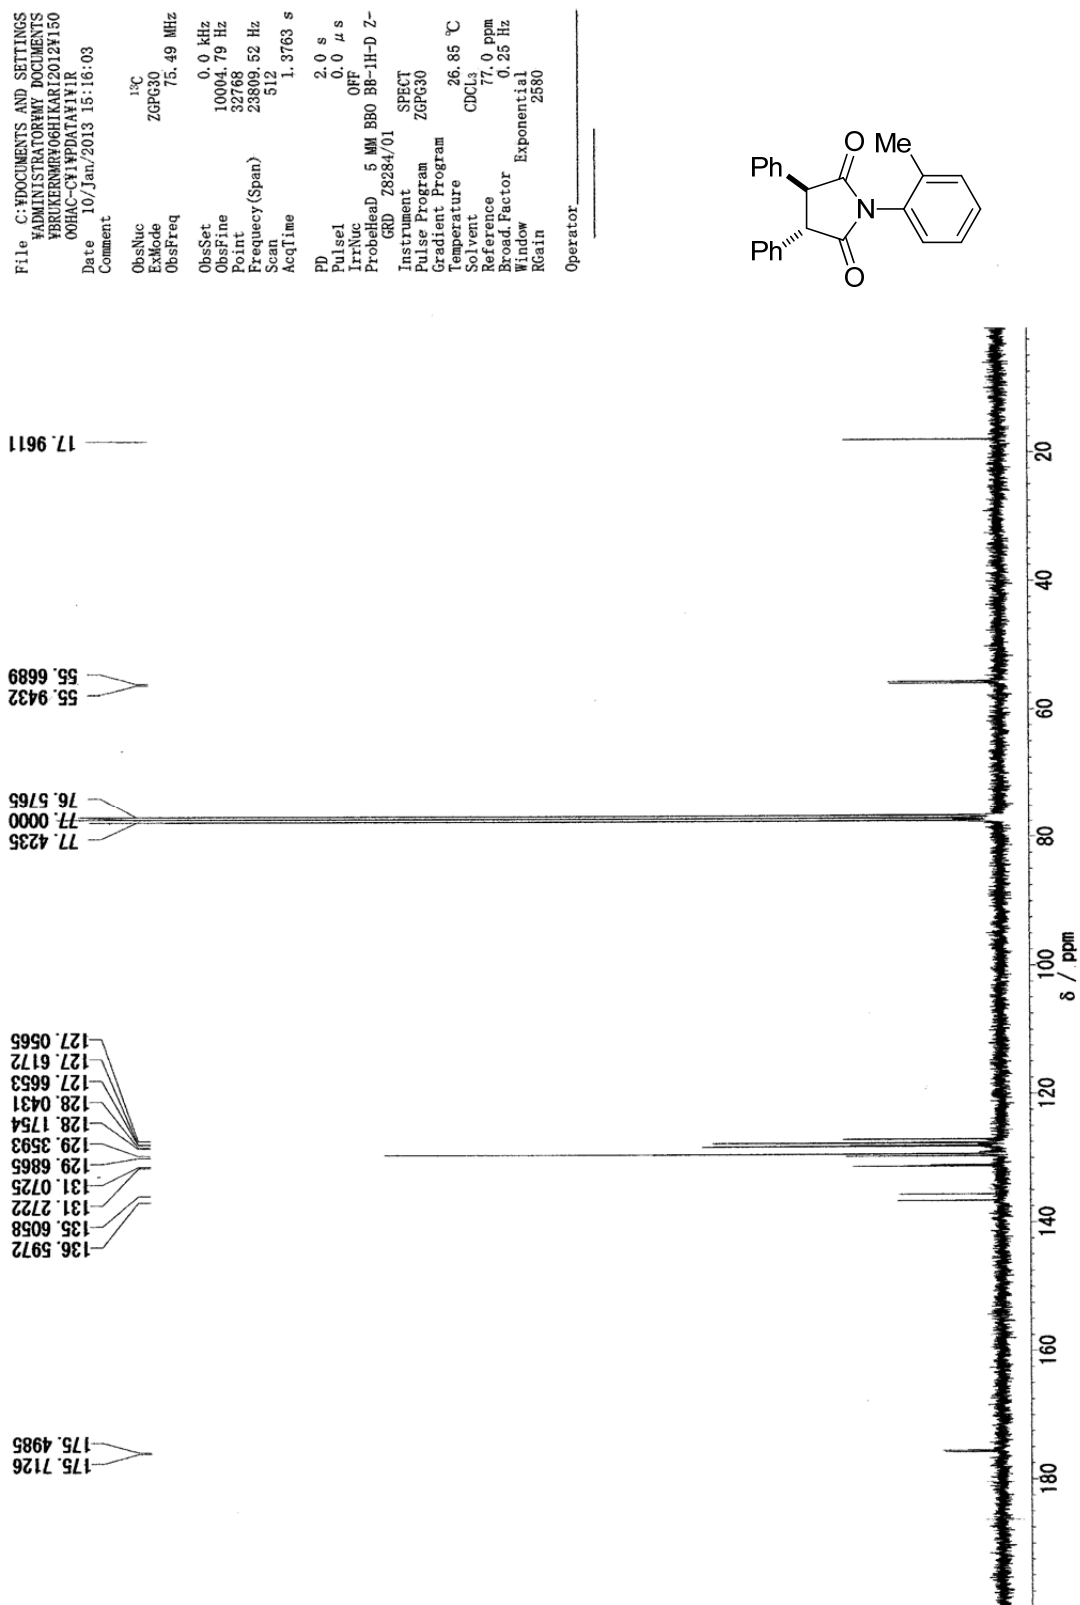

Figure S29. <sup>1</sup>H NMR spectrum for *trans*-*N*-(3-methylphenyl)-3,4-diphenylsuccinimide **3j**

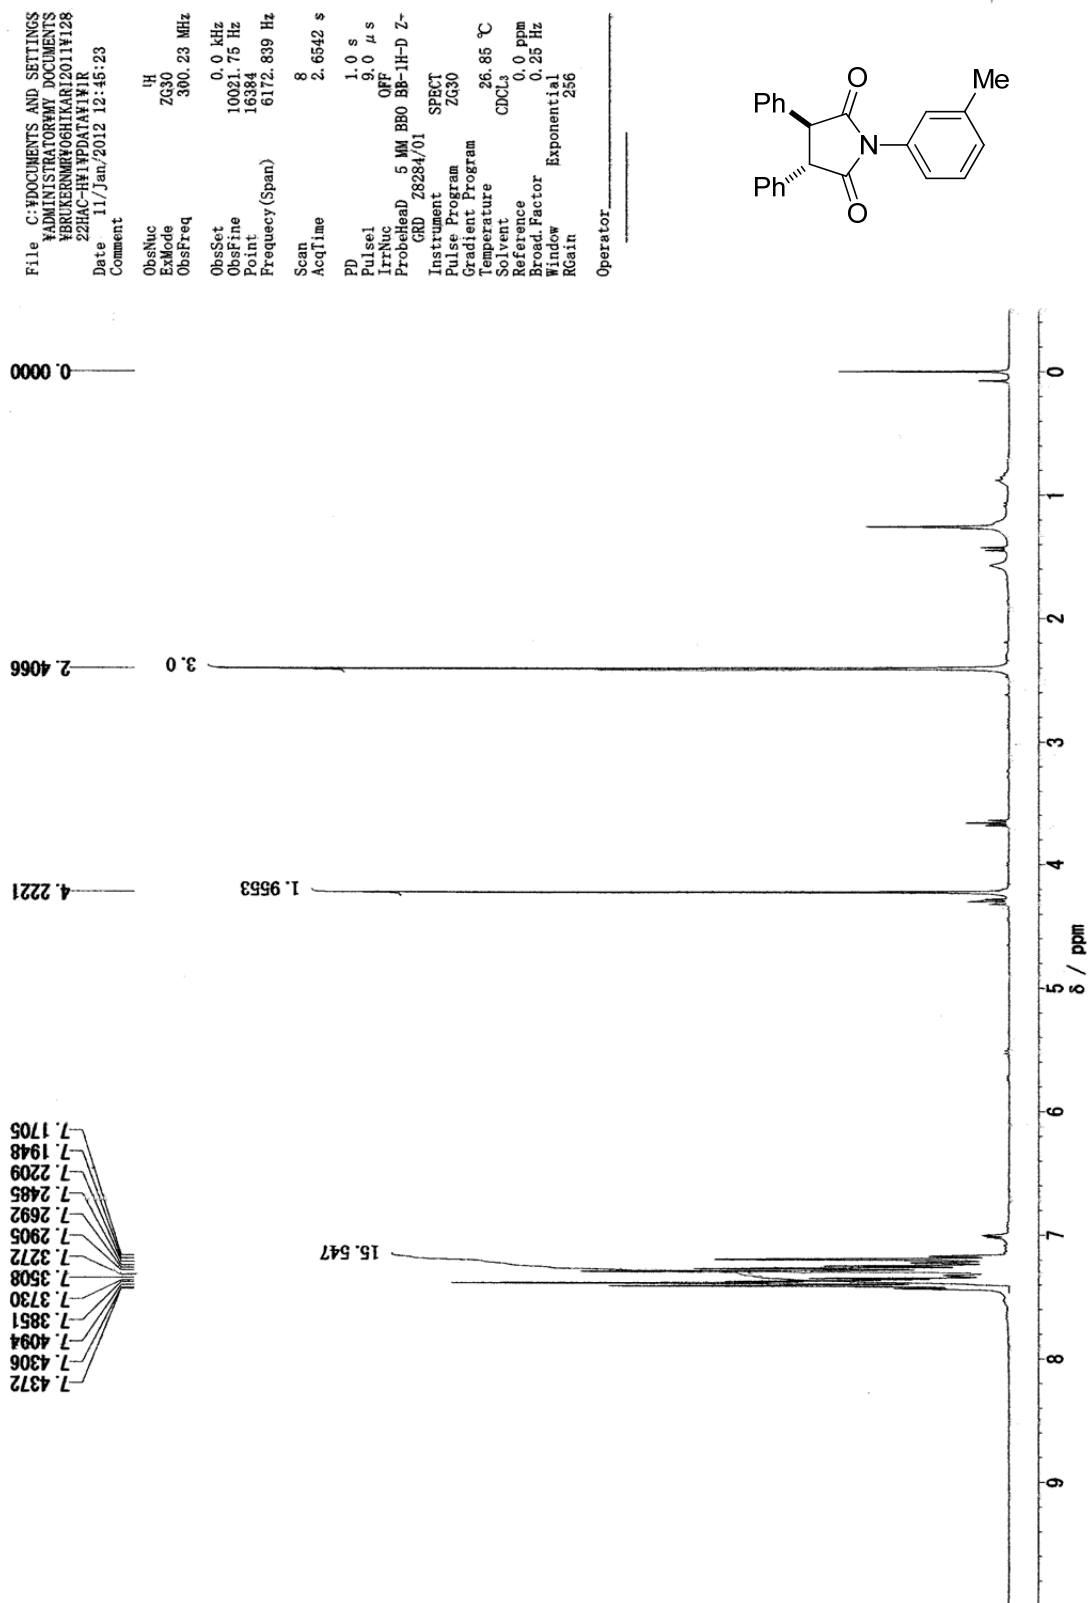



Figure S30. <sup>13</sup>C NMR spectrum for *trans*-*N*-(3-methylphenyl)-3,4-diphenylsuccinimide **3j**

File C:\DOCUMENTS AND SETTINGS  
ADMINISTRATOR\WORKING DOCUMENTS  
HERUKER\MR06\H1KAR\2011\128  
23HAC-CY1\DATA\11R  
Date 11/Jan/2012 13:02:38  
Comment  
ObsNuc <sup>13</sup>C  
ExMode ZGPG30  
ObsFreq 75.49 MHz  
ObsSet 0.0 kHz  
ObsFine 10004.79 Hz  
Point 32768  
Frequency (Span) 23809.52 Hz  
Scan 256  
AcqTime 1.3763 s  
PD  
PulSel 2.0 s  
IrrNuc OFF  
ProbeHead 5 MM BBO BB-1H-D Z-  
GRD Z8284/01  
Instrument SPECT  
Pulse Program ZGPG30  
Gradient Program  
Temperature 26.85 °C  
Solvent CDCl<sub>3</sub>  
Reference 77.0 ppm  
Broad.Factor 0.25 Hz  
Window Exponential  
RGain 2048  
Operator

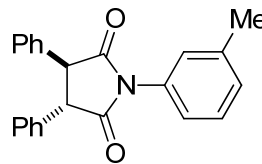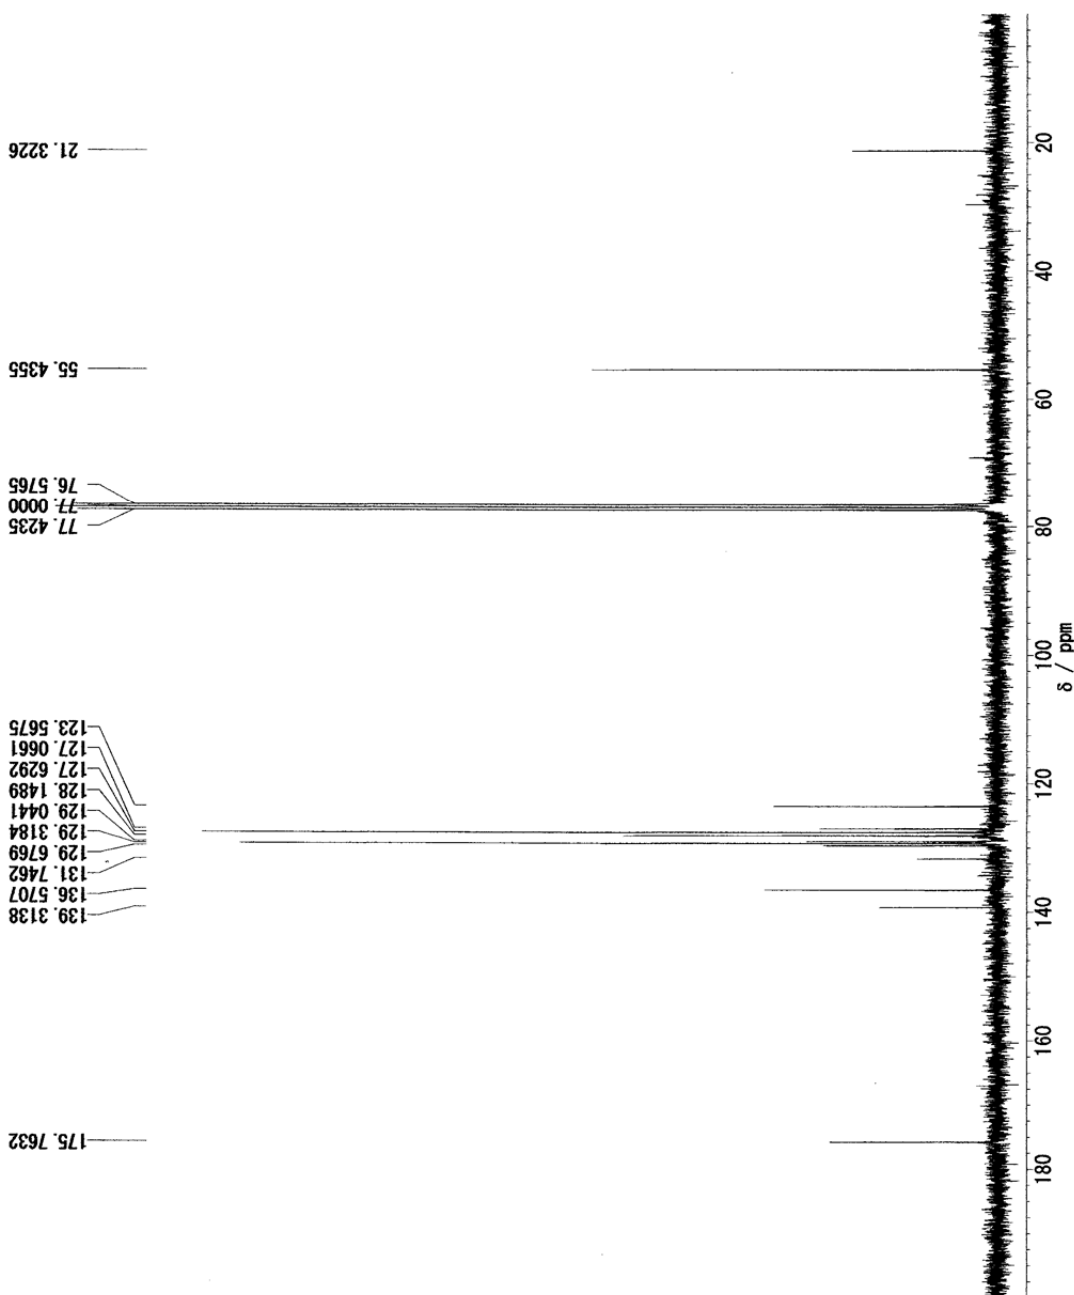

Figure S31. <sup>1</sup>H NMR spectrum for *trans*-*N*-(4-methylphenyl)-3,4-diphenylsuccinimide **3k**

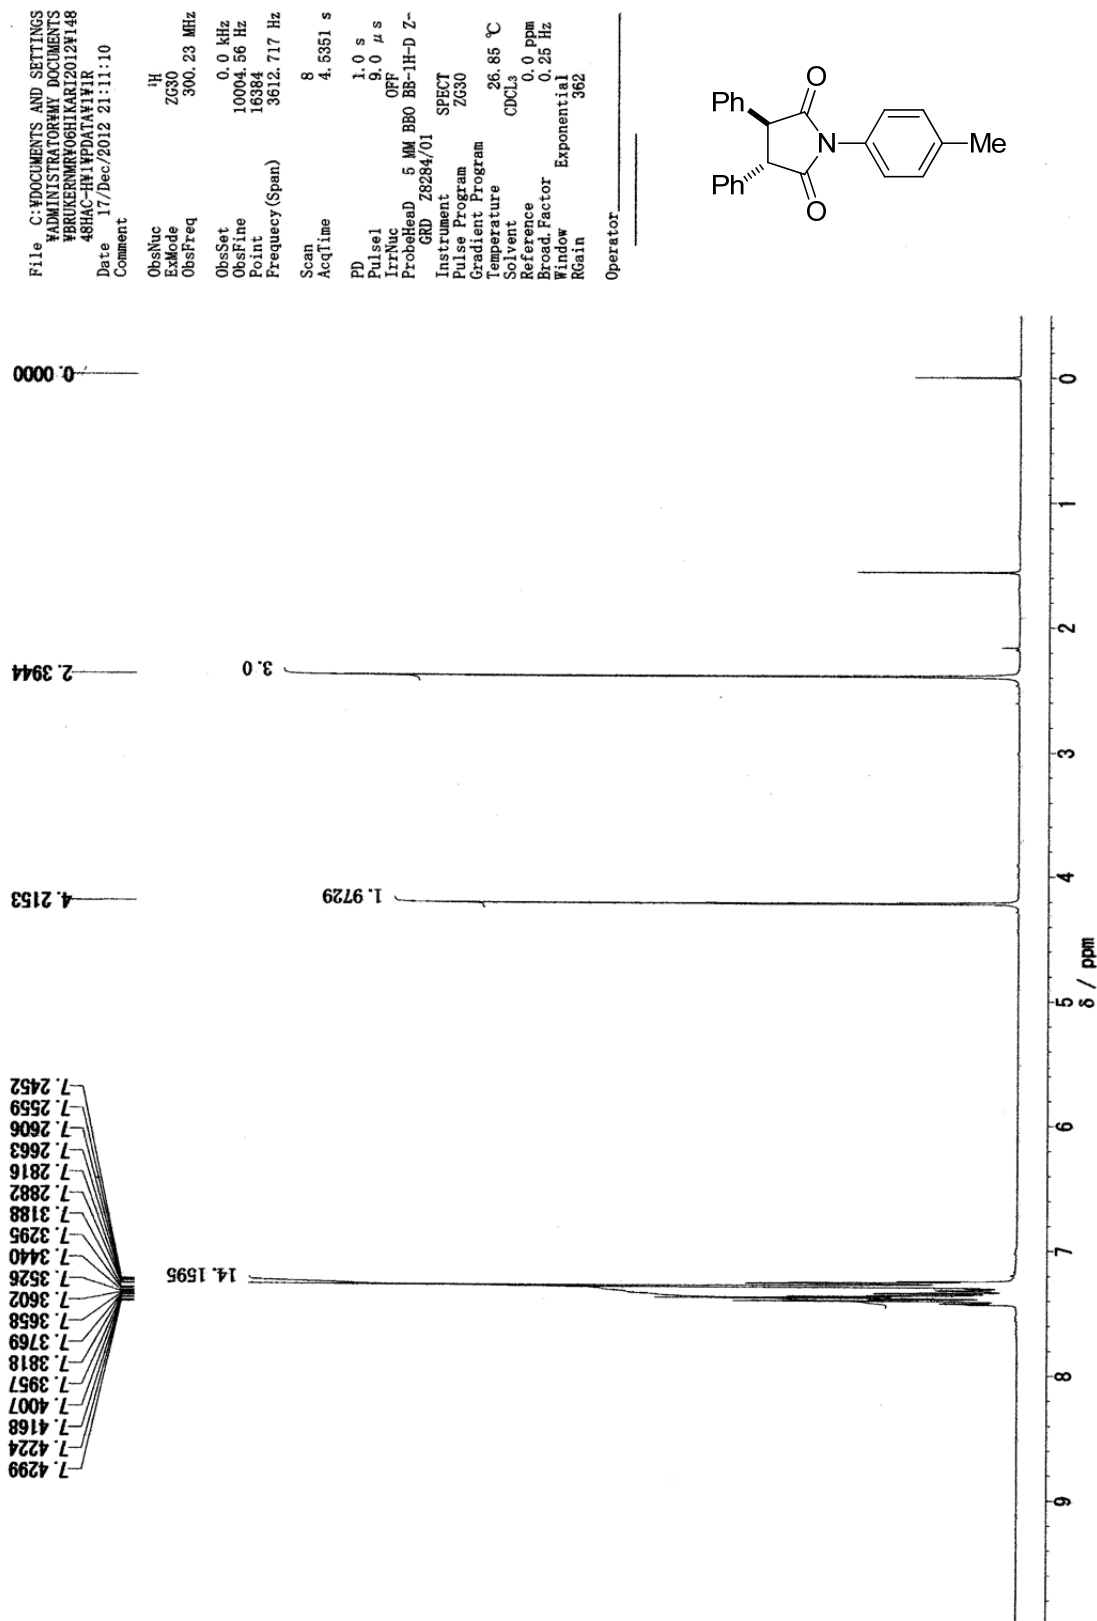

Figure S32. <sup>13</sup>C NMR spectrum for *trans*-*N*-(4-methylphenyl)-3,4-diphenylsuccinimide 3k

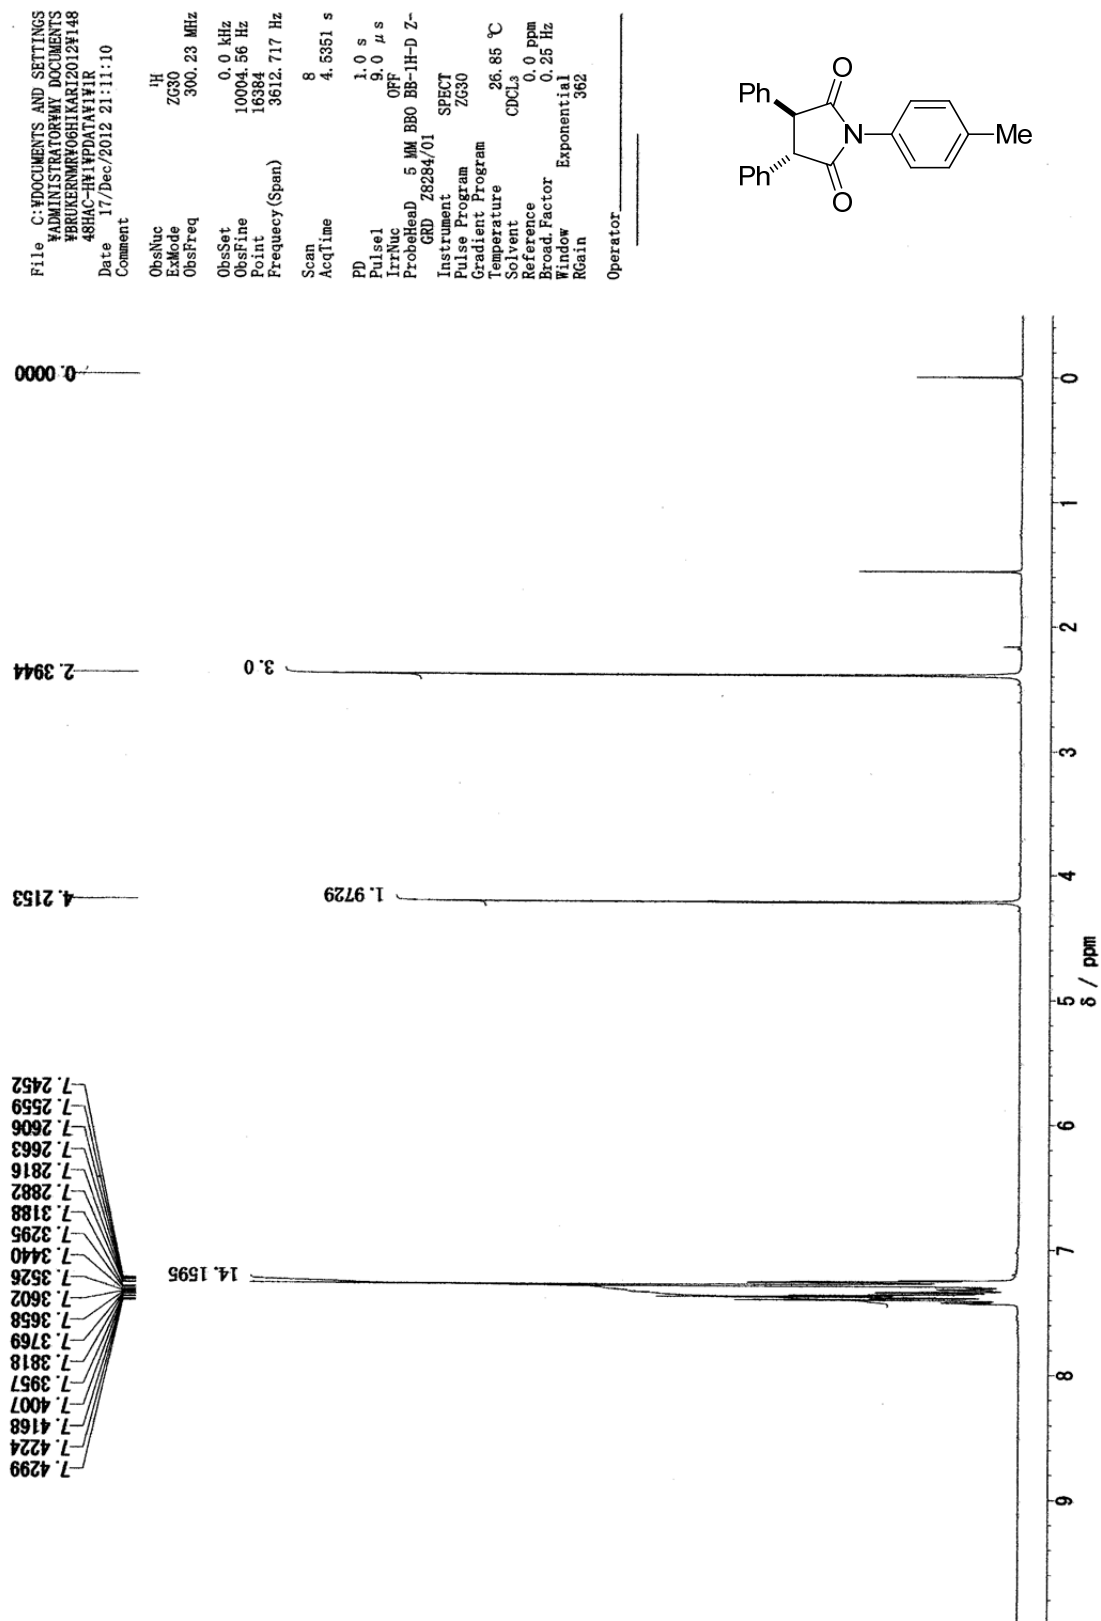

**Figure S33.** HPLC analysis of **3d**, (a) racemic, (b) 90% ee. Ee value was determined using a chiral column (Daicel Ind. CHIRALPAK AD-H), flow rate 0.7 mL/min, solvent, Hexane : EtOH = 95 : 5.

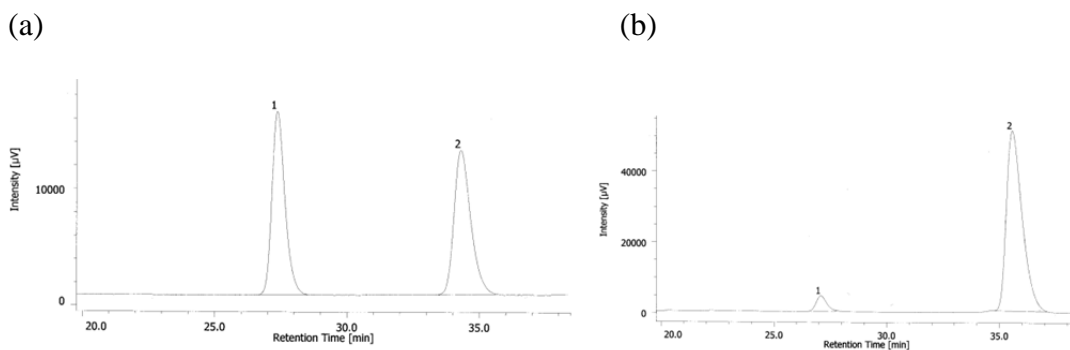

**Figure S34.** HPLC analysis of **3e**, (a) racemic, (b) 97% ee. Ee value was determined using a chiral column (Daicel Ind. CHIRALPAK IA-3), flow rate 0.5 mL/min, solvent, Hexane : EtOH = 98 : 2.

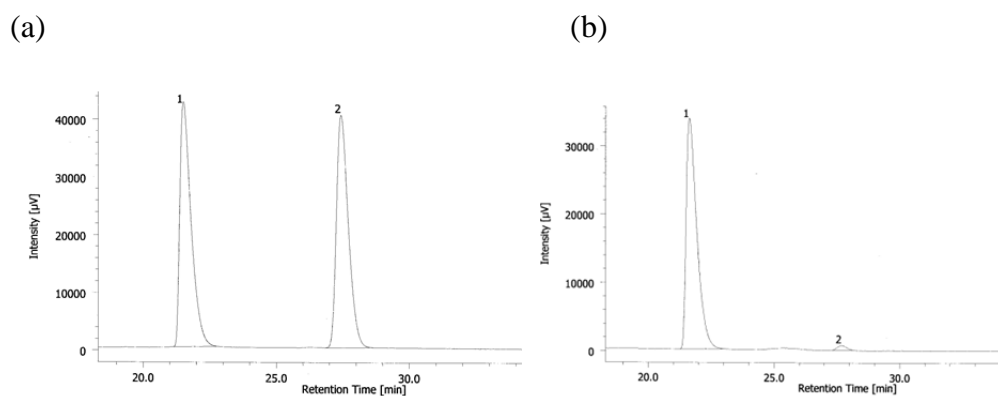

**Figure S35.** HPLC analysis of **3i**, (a) racemic, (b) 98% ee. Ee value was determined using a chiral column (Daicel Ind. CHIRALPAK IA), flow rate 0.7 mL/min, solvent, Hexane : EtOH = 90 : 10.

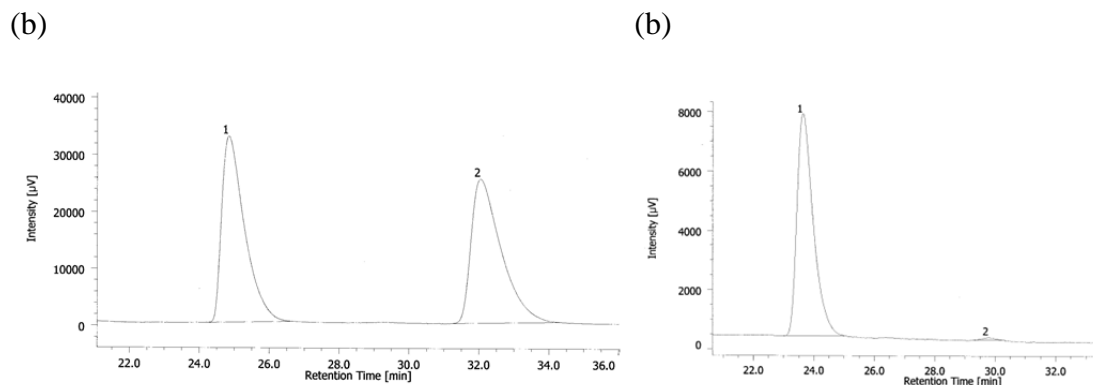

Supplement: c3cc41678j.pdf [file c3cc41678j.pdf]
